# Supplementary material for: Iron-molybdenum cofactor synthesis by a thermophilic nitrogenase devoid of the scaffold NifEN
Source: PubMed Central journal article supplement (PMC11573651; doi:10.1073/pnas.2406198121), 2024-11-06
Supplement: pnas.2406198121.sapp.pdf [file pnas.2406198121.sapp.pdf]

1 **SUPPORTING INFORMATION**

2  
3 **Iron-molybdenum cofactor synthesis by a thermophilic nitrogenase devoid**  
4 **of the scaffold NifEN**

5  
6 Lucía Payá-Tormo<sup>1,2</sup>, Carlos Echavarri-Erasun,<sup>1,2\*</sup> Natalia Makarovskiy-Saavedra,<sup>1,2</sup> Ana  
7 Pérez-González,<sup>1</sup> Zhi-Yong Yang,<sup>3</sup> Yisong Guo,<sup>4</sup> Lance C. Seefeldt,<sup>3</sup> and Luis M. Rubio<sup>1,2\*</sup>

8  
9  
10 <sup>1</sup> Centro de Biotecnología y Genómica de Plantas (UPM-INIA/CSIC), Campus Montegancedo,  
11 28223 Pozuelo de Alarcón (Madrid), Spain.

12 <sup>2</sup> Departamento de Biotecnología-Biología Vegetal, Escuela Técnica Superior de Ingeniería  
13 Agronómica, Alimentaria y de Biosistemas, Universidad Politécnica de Madrid, 28040 Madrid,  
14 Spain.

15 <sup>3</sup> Department of Chemistry and Biochemistry, Utah State University, Logan, Utah, USA

16 <sup>4</sup> Department of Chemistry, Carnegie Mellon University, Pittsburgh, PA 15213, USA

17  
18 \*Correspondence: Luis M. Rubio (luis.rubio@csic.es); Carlos Echavarri-Erasun  
19 (carlos.echavarri@upm.es).

20

## 21 SUPPORTING RESULTS

### 22 **NifH<sup>RS</sup> conserves key amino acid residues for [Fe<sub>4</sub>S<sub>4</sub>] binding and NifDK interaction.**

23 Amino acid sequence analysis of NifH<sup>RS</sup> (UniProt accession number A5USK5) revealed  
24 conservation of consensus residues present in characterized NifH proteins (Figure S6 and Table  
25 S2). In particular, NifH<sup>RS</sup> conserves the cysteine residues that bind the [Fe<sub>4</sub>S<sub>4</sub>] cluster and other  
26 residues that play an important role in stabilizing the complex with NifDK during electron  
27 transfer (e.g. R<sup>98</sup>, which corresponds to the R<sup>100</sup> in NifH<sup>Av</sup>) (1, 2). Other residues involved in  
28 NifDK protein interaction (e.g. E<sup>112</sup>) were not conserved, which is not unusual as some residues  
29 important for complex formation are species-specific (1). A structural model of NifH<sup>RS</sup>  
30 constructed using as template NifH from *Methanosarcina acetivorans* (PDB ID 6NZJ)(3),  
31 showed that the two structures were virtually indistinguishable (all residues overlapping with  
32 an RMSD of 0.181 Å), except for the A<sup>96</sup> and G<sup>96</sup> in NifH<sup>Ma</sup> and NifH<sup>RS</sup>, respectively, which  
33 are located in a 4 Å environment around the [Fe<sub>4</sub>S<sub>4</sub>] cluster (Figure S7).

34 **NifH<sup>RS</sup> is a homodimer containing one [Fe<sub>4</sub>S<sub>4</sub>] cluster.** His-tagged-NifH<sup>RS</sup> (called NifH<sup>RS</sup>  
35 for simplicity) was purified from heterologous *E. coli* BL21 (DE3) cells overexpressing the *isc*  
36 genes for enhanced [FeS] cluster biosynthesis (4). Co-expression with *nifM* was not necessary  
37 because NifH<sup>RS</sup> has been shown to be NifM-independent (5). NifH<sup>RS</sup> was purified to  
38 homogeneity under strict anaerobic conditions in buffers containing sodium dithionite (DTH)  
39 as reducing agent (Figure S8A). The identity of purified NifH<sup>RS</sup> was confirmed as  
40 RoseRS\_1201 by mass spectrometry. Size exclusion chromatography yielded native molecular  
41 mass of 52 kDa protein, consistent with a homodimer structure (Figure S8B). The Fe content  
42 was  $3.7 \pm 0.9$  atoms per NifH<sup>RS</sup> dimer (Table 1). The UV-visible spectrum of *as isolated* NifH<sup>RS</sup>  
43 presented a shoulder at 315 nm and a broad peak around 400 nm indicative of [Fe<sub>4</sub>S<sub>4</sub>] clusters  
44 (6). Exposure to air resulted in the disappearance of the 400 nm peak and the appearance of a  
45 400-430 nm peak consistent with degradation of [Fe<sub>4</sub>S<sub>4</sub>] into [Fe<sub>2</sub>S<sub>2</sub>] clusters (Figure S9A),  
46 indicating sensitivity to O<sub>2</sub> as described for other NifH proteins (7, 8). The EPR spectrum of  
47 DTH-reduced NifH<sup>RS</sup> presented a S = 1/2 rhombic signal in the  $g \approx 2$  region with  $g$ -values of  
48 2.01, 1.94, 1.85, and a S = 3/2 EPR signal around  $g \approx 5$  (Figure S9B). It resembled EPR spectra  
49 of *A. vinelandii*, *K. oxytoca* and *C. pasteurianum* NifH proteins found in the paramagnetic 1<sup>+</sup>  
50 oxidation state ([Fe<sub>4</sub>S<sub>4</sub>]<sup>1+</sup>) with 3 Fe<sup>2+</sup> and 1 Fe<sup>3+</sup> atoms (9-11). A signal detected around  $g =$   
51 4.3 could arise from adventitious iron (9).

52 **NifH<sup>RS</sup> exhibits the three activities characteristic of NifH.** NifH<sup>RS</sup> dinitrogenase reductase  
53 activity was confirmed by titrating NifDK<sup>Av</sup> acetylene reduction activity (Figure S10). A 200-

54 fold molar excess of NifH<sup>RS</sup> was required for maximal activity. NifH<sup>RS</sup> also supported N<sub>2</sub>  
55 reduction to NH<sub>3</sub> by NifDK<sup>Av</sup> (Table S3). Additionally, NifH<sup>RS</sup> demonstrated activity in the *in*  
56 *vitro* FeMo-co synthesis assay in which purified NifB-co is converted into FeMo-co and  
57 inserted into apo-NifDK<sup>Av</sup> to reconstitute nitrogenase activity in reactions that require  
58 molybdate, homocitrate, ATP, NifX<sup>Av</sup>, apo-NifEN<sup>Av</sup>, and apo-NifDK<sup>Av</sup> (Table S3). Finally, the  
59 capacity of NifH<sup>RS</sup> to assemble the P-clusters was demonstrated through the *in vitro*  
60 reconstitution of nitrogenase activity of apo-NifDK<sup>Av</sup> containing immature P-clusters, for  
61 which NifH<sup>RS</sup> and apo-NifDK<sup>Av</sup> were incubated prior to the insertion of FeMo-co in the  
62 presence of ATP regenerating mixture (Table S3). Reactions using NifH<sup>RS</sup> in the P-cluster  
63 maturation step and NifH<sup>Av</sup> in the acetylene reduction showed 5-fold more activity than  
64 reactions using NifH<sup>RS</sup> in both steps. The lower activities observed for NifH<sup>RS</sup> in comparison  
65 to NifH<sup>Av</sup> may be attributed to the low assay temperature (30 °C) and suboptimal interactions  
66 of the former with the *A. vinelandii* components required for P-cluster maturation, FeMo-co  
67 synthesis, and nitrogenase activity.

68 **NifH<sup>RS</sup> supports diazotrophic growth in *A. vinelandii*.** The NifH<sup>RS</sup> participation in P-cluster  
69 and FeMo-co formation, and its compatibility with NifDK<sup>Av</sup>, were further substantiated by the  
70 capacity to restore diazotrophic growth of an *A. vinelandii* *nifH* deletion mutant (Figure S11).  
71 The *A. vinelandii* DC127 strain carries a *nifH<sup>RS</sup>* gene in place of *nifH<sup>Av</sup>*. It additionally lacks  
72 *vnfH* to prevent compensation of NifH function by VnfH (12). NifH<sup>RS</sup> supports *A. vinelandii*  
73 diazotrophic growth, albeit not as strongly as the native NifH<sup>Av</sup>, in alignment with the results  
74 of the *in vitro* assays.

75 **NifB<sup>RS</sup> conserves key amino acid residues important for [Fe<sub>4</sub>S<sub>4</sub>] cluster binding and**  
76 **activity.** Amino acid sequence analysis of NifB<sup>RS</sup> (UniProt accession number A5USK4)  
77 revealed conservation of consensus residues present in characterized NifB proteins, including  
78 the *Methanotheroxicola thermoacetophila* NifB<sup>Mt</sup> (UniProt accession number A0B690), which 3D  
79 structure has been determined by protein crystallography (13). NifB<sup>RS</sup> conserves the radical  
80 SAM specific motif that coordinates the RS [Fe<sub>4</sub>S<sub>4</sub>]-SAM cluster, and motifs to coordinate two  
81 additional [Fe<sub>4</sub>S<sub>4</sub>] clusters, called K1 and K2, that serve as substrates and are fused to generate  
82 the [Fe<sub>8</sub>S<sub>9</sub>C] NifB-co (Figure S12 and Table S4). A structural model of NifB<sup>RS</sup> constructed  
83 using as template NifB<sup>Mt</sup> (PDB ID 6Y1X) (13), showed that the two structures were virtually  
84 indistinguishable (87% sequence coverage and overlap with an RMSD of 0.111 Å), except for  
85 slight differences 4 Å around the RS and K1 clusters (Figure S13).

86 **NifB<sup>RS</sup> is a monomer containing three [Fe<sub>4</sub>S<sub>4</sub>] clusters.** Purified preparations of twin-strep-

87 tagged NifB<sup>RS</sup> (called NifB<sup>RS</sup> for simplicity) were obtained from recombinant *E. coli* BL21  
88 (DE3) cells co-expressing the *A. vinelandii nifUS<sup>Av</sup>* genes by anaerobic Strep-Tactin affinity  
89 chromatography. Purified NifB<sup>RS</sup> appeared as a 30-35 kDa doublet on SDS-PAGE suggesting  
90 some level of protein degradation (Figure S14A). Mass spectrometry confirmed that both bands  
91 were NifB<sup>RS</sup> (RoseRS\_1200), the lower band being a C-terminal truncated species (Figure  
92 S14B). The band observed at 60 kDa was identified as GroEL, indicating poor solubility of  
93 overexpressed NifB<sup>RS</sup> in *E. coli*. Size exclusion chromatography revealed native molecular  
94 mass of 32 kDa consistent with a monomeric structure (Figure S14C). As isolated NifB<sup>RS</sup>  
95 monomers contained an average of  $8.2 \pm 2.6$  Fe atoms (Table 1). The UV-visible spectrum of  
96 *as isolated* NifB<sup>RS</sup> preparations showed a profile common to other [Fe<sub>4</sub>S<sub>4</sub>] cluster-containing  
97 proteins and O<sub>2</sub>-dependent transitions indicative of cluster degradation (Figure S15A). NifB<sup>RS</sup>  
98 exhibited EPR signals from its three paramagnetic [Fe<sub>4</sub>S<sub>4</sub>]<sup>+1</sup> clusters (Figure S15B), as it had  
99 been previously reported for *Methanocaldococcus infernus* and *Methanobacterium*  
100 *thermoautotrophicum* NifB proteins (14, 15). Therefore, spectroscopic analysis concluded that  
101 purified NifB<sup>RS</sup> preparations contain all the metal clusters required for NifB activity albeit not  
102 at full occupancy.

103 **NifB<sup>RS</sup> functions in the *in vitro* FeMo-co synthesis assay.** NifB<sup>RS</sup>-dependent FeMo-co  
104 synthesis and insertion into apo-NifDK was determined in the assay established by Curatti  
105 using proteins purified from *A. vinelandii* (with the exception of NifB<sup>RS</sup>) (16). Complete  
106 reactions containing NifB<sup>RS</sup>, NifX<sup>Av</sup>, apo-NifEN<sup>Av</sup> (a form of NifEN containing two structural  
107 [Fe<sub>4</sub>S<sub>4</sub>] clusters but lacking bound FeMo-co precursors), NifH<sup>Av</sup>, apo-NifDK<sup>Av</sup>, ATP,  
108 homocitrate, SAM, molybdate, FeSO<sub>4</sub>, and Na<sub>2</sub>S were able to reconstitute nitrogenase activity,  
109 with NifB<sup>RS</sup> being able to fulfill the role of NifB-co. NifB<sup>RS</sup> obtained from recombinant *E. coli*  
110 cells co-expressing *nifU<sup>Av</sup>*, *nifS<sup>Av</sup>* and *fdxN<sup>Av</sup>* was slightly more effective than NifB<sup>RS</sup> produced  
111 in the absence of *fdxN<sup>Av</sup>* (Figure S16).

112 **NifB<sup>RS</sup> restored diazotrophic growth of a *K. oxytoca nifB* deletion mutant.** *K. oxytoca*  
113 UC9 ( $\Delta nifB$ ) (17) was used in a genetic complementation study to investigate the function of  
114 NifB<sup>RS</sup> *in vivo*. A his-tagged version of *nifB<sup>RS</sup>* was cloned under the control of the IPTG-  
115 inducible *trc* promoter and used to transform UC9. Diazotrophic growth and *in vivo* acetylene  
116 reduction activity were measured for 72 h following nitrogenase derepression and IPTG  
117 induction (Figure S17A and S17B). Wild type *K. oxytoca* (UN strain) showed maximum  
118 nitrogenase activity after 8 h of derepression ( $9.2 \pm 0.2$  nmol C<sub>2</sub>H<sub>4</sub>·min<sup>-1</sup>·OD<sup>-1</sup>) and grew to an  
119 OD<sub>600nm</sub> of 2. The UC9 strain transformed with his-*nifB<sup>RS</sup>* required 48 h of diazotrophic growth

120 for maximum nitrogenase activity ( $3.4 \pm 0.6 \text{ nmol C}_2\text{H}_4 \cdot \text{min}^{-1} \cdot \text{OD}^{-1}$ ) and grew to an  $\text{OD}_{600\text{nm}}$   
121 of 1.1. Thus, nitrogenase activity in the complemented strain was 37% of that of the wild-type  
122 strain. Maximum nitrogenase activity correlated with His-NifB<sup>RS</sup> protein expression (Figure  
123 S17C). UC9 transformed with the expression vector lacking *nifB*<sup>RS</sup> showed neither acetylene  
124 reduction activity nor diazotrophic growth.

125

## 126 SUPPORTING MATERIALS AND METHODS

127 **Bacterial strains and plasmids.** *E. coli* DH5 $\alpha$  and BL21 (DE3) strains were used for cloning  
128 and Nif protein overexpression, respectively. Plasmids constructed in this work are shown in  
129 Table S6. The *Roseiflexus sp.* RS-1 *nif* gene cluster was synthesized by GeneScript (New Jersey,  
130 USA) with codon optimization for use in *E. coli* and cloned into the *NdeI* and *BamHI* sites of  
131 pET16b to generate pRHB513.

132 NifH<sup>RS</sup> (RoseRS\_1201) was overexpressed from pRHB513 as an N-terminal His-tagged  
133 NifH<sup>RS</sup> fusion. NifB<sup>RS</sup> (RoseRS\_1200) was overexpressed from pN2LP123, a modified  
134 pET16b vector in which the His-tag encoding sequence was replaced with a sequence encoding  
135 a double *streptagII* (TwinStreptagII) followed by a TEV-protease recognition site. Then, *nifB*<sup>RS</sup>  
136 was cloned into the modified pET16b vector using *NdeI* and *BamHI* restriction sites. NifDK<sup>RS</sup>  
137 was overexpressed from pN2LP49. The *nifD*<sup>RS</sup> (RoseRS\_1199) and *nifK*<sup>RS</sup> (RoseRS\_1198)  
138 genes were amplified together from pRHB513 using Phusion Hot Start II High-Fidelity DNA  
139 Polymerase (Thermo Fisher Scientific) with the primers: 5'-  
140 CAGGAGCTCATGTGGTCTCATCCGCAGTTTGAAAAATGCAGTTCAAATGCAATC  
141 AG-3' and 5'-CAGAAGCTTCTAACCGTGAGCCGTGG-3'. A sequence encoding a  
142 StrepTagII at the 5' end of *nifD*<sup>RS</sup> was included in the forward primer to generate a StrepTagII-  
143 NifD<sup>RS</sup> fusion. PCR resulted in a 2,855 bp DNA fragment, which was then inserted into the  
144 *SacI* and *HindIII* sites of vector pTRC99a to generate pN2LP49.

145 In some instances, the overexpression of Nif proteins in *E. coli* require additional proteins  
146 involved in [FeS] cluster biosynthesis (15, 18). Three pRSF-*isc-metK*-Duet-1 derivative  
147 plasmids were constructed to facilitate Nif protein expression. In pN2LP30 the *E. coli isc* gene  
148 cluster located between the *NcoI* and *NotI* sites was replaced by the *A. vinelandii nifUS*  
149 sequences amplified with oligonucleotides: 5'-  
150 TTAATAAGGAGATATACCATGGCCTGGGATTATTCGGAAA-3' and 5'-  
151 TTCGACTTAAGCATTATGCGGCCGCTCAGCCGTAGACCGG-3' using plasmid

152 pRHB608 as template (13). Both primers contained 15-base pair extensions complementary to  
153 the target vector for ELIC cloning of *nifU<sup>Av</sup>* and *nifS<sup>Av</sup>* genes (19). Plasmids pN2LP50 and  
154 pN2LP51 were derivatives of pRSF-*isc-metK*-Duet-1 and pRSF-*nifUS-metK*-Duet-1,  
155 respectively, in which the *metK* gene was replaced by *nifH<sup>RS</sup>* using the *Nde*I and *Xho*I restriction  
156 sites.

157 DNA digestions were performed with New England Biolabs restriction enzymes; ligations  
158 were performed with Promega T4 ligase; PCR amplifications were performed using Phusion  
159 Hot Start II High-Fidelity DNA Polymerase. *E. coli* competent cells were transformed using  
160 heat-shock and selected using appropriate antibiotics. Plasmid extractions were performed  
161 using Qiaprep Spin Miniprep kit (Qiagen), and cloning fidelity was verified by sequencing  
162 (Macrogen).

163 **Overexpression of *Roseiflexus* proteins in *E. coli*.** Transformed *E. coli* BL21 (DE3) cells  
164 containing combinations of the *nifH<sup>RS</sup>*, *nifB<sup>RS</sup>*, or *nifDK<sup>RS</sup>* expression plasmids and  
165 supplementary vectors (pRSF-*isc-metK*-Duet-1, pN2LP30, pN2LP50, or pN2LP51) were  
166 grown in LB liquid media plus antibiotics for 2-3 hours at 37 °C and 200 rpm until an OD<sub>600nm</sub>  
167 of 0.6-0.8. This preculture was then used to inoculate four 4-L flasks, each containing 1 L of  
168 LB medium supplemented with 20 µM ammonium iron (III) citrate and antibiotics, to an  
169 OD<sub>600nm</sub> of 0.02-0.05. Early aerobic growth conditions were established at 37 °C and 200 rpm.  
170 When cultures reached 0.6-0.8 of OD<sub>600nm</sub>, the media was supplemented with 8.7 mM lactose,  
171 2 mM cysteine, and 0.2 mM ammonium iron (III), growth conditions were changed to 30 °C  
172 and 105 rpm for overnight overexpression (20, 21). The next day cells were collected by  
173 centrifugation at 5,000 x g for 10 min at 4 °C, and the resulting cell pellets were frozen in liquid  
174 N<sub>2</sub> and stored at -80 °C.

175 **Preparation of *E. coli* cell-free-extracts (CFE).** All buffers used were made anaerobic by  
176 extensive sparging with purified N<sub>2</sub> followed by the addition of 2 mM DTH. Cells were  
177 resuspended in anaerobic lysis buffer composed of the corresponding buffer A, which changed  
178 depending of the protein to be purified (see Materials and Methods in main text), supplemented  
179 with 1 mM phenylmethylsulfonyl fluoride, 2.3 µM leupeptin, and 5 µg/mL DNase I, using a  
180 cell to buffer ratio (w/v) in the range of 1:1 to 1:3. Cells were lysed passing through a  
181 Emulsiflex-C5 homogenizer (Avestin) previously equilibrated with anaerobic lysis buffer  
182 using 15,000 psi disruption pressure under strict anaerobic conditions. The homogenized  
183 mixture was centrifuged at 50,000 x g for at least 45 min at 4 °C in dual-sealed centrifuge  
184 bottles in a Beckman JA-25.50 rotor. The resulting soluble CFE was filtered through a 0.2 µM

185 membrane inside a glove box to remove precipitated material before loading onto  
186 chromatography columns.

187 **Overexpression and purification of NifH<sup>RS</sup> from *Saccharomyces cerevisiae*.** Strep-tagged  
188 NifH<sup>RS</sup> used in the P-cluster maturation assays was obtained from *S. cerevisiae* SB321Y  
189 expressing mitochondrial targeted NifH<sup>RS</sup>, NifU<sup>Av</sup> and NifS<sup>Av</sup> as described (5).

190 **Purification of Strep-tagged apoNifDK<sup>Av</sup> with immature P-clusters from *A. vinelandii*.**  
191 DJ2106 (*ΔnifH*) cells were grown in a 240-L fermenter at 30 °C in modified Burk's medium  
192 with 5.7 mM ammonium acetate as. Once ammonium was exhausted, cells were cultured for 3  
193 additional hours and harvested. Cells were resuspended in anaerobic 50 mM Tris-HCl pH 8.3,  
194 500 mM NaCl, 20% glycerol, and 2 mM DTH, and purified using Strep-Tactin®XT 4Flow®  
195 high-capacity columns (IBA Life Sciences) as described (22). Purifications were conducted  
196 inside a glove box (MBraun) containing <0.1 ppm of O<sub>2</sub>.

197 **UV-visible spectroscopy.** Samples for UV-visible spectroscopy were prepared anaerobically  
198 inside a MBraun glove box. Pure proteins were first desalted of DTH traces using buffer A  
199 (specific for each protein, see Materials and Methods in main text) using PD-10 desalting  
200 columns. Ten to 100 μL of desalted pure proteins were diluted in 700 μL of buffer A without  
201 DTH. Samples were moved into sealed quartz spectroscopy cuvettes and were scanned from  
202 225 nm to 800 nm using a dual-beam Shimadzu UV-2600 spectrophotometer (Shimadzu,  
203 Japan). UV-visible absorption spectra were recorded using buffer A as baseline. The absorbance  
204 at 800 nm was subtracted and the spectra were normalized to 279 nm.

205 **NifH<sup>RS</sup> and NifB<sup>RS</sup> EPR spectroscopy.** NifH<sup>RS</sup> and NifB<sup>RS</sup> analysis was performed using X-  
206 band (9.64 GHz) EPR spectra recorded in a Bruker E500A spectrometer equipped with an  
207 Oxford ESR 910 cryostat for low-temperature measurements (Bruker, Massachusetts, USA).  
208 The microwave frequency was calibrated using a frequency counter, and the magnetic field  
209 was calibrated using an NMR gauss meter. The temperature of the X-band cryostat was  
210 calibrated using a carbon-glass CGR-1-1000 resistor temperature probe (LakeShore  
211 Cryotronics, Ohio, USA). For every EPR spectrum, a modulation frequency and amplitude of  
212 100 kHz and 1 mT were used. EPR spectral simulations were performed with Spin Count (23)  
213 using a 1 mM Cu(II)ethylenediaminetetraacetic solution as spin quantification standard.

214 **Protein methods.** Protein concentration was determined using the BCA Protein Assay Kit  
215 (Pierce, USA) (24). To eliminate the interfering effect of DTH, pure protein samples were pre-  
216 treated with iodoacetamide (2 mg/mL) for 15 minutes at 37 °C before conducting the BCA

217 assay. The Fe<sup>2+</sup> content of purified protein samples was estimated using the bipyridyl assay  
218 (25). Absorbance at 520 nm was measured using a Shimadzu UV-2600 spectrophotometer. The  
219 procedure for SDS-PAGE has been described (26).

220 **Size-exclusion chromatography.** Purified NifH<sup>RS</sup>, NifB<sup>RS</sup>, and NifDK<sup>RS</sup> were analyzed by  
221 size-exclusion chromatography using a HiLoad 16/600 Superdex 200 column (GE Healthcare)  
222 controlled by a AKTA Prime FPLC (GE Healthcare). The column was equilibrated with 100  
223 mM Tris-HCl, pH 7.6, 200 mM NaCl, 10% glycerol, and 2 mM DTH at 1 mL/min. The column  
224 was calibrated for molecular mass determination using conanbunin (75 kDa), aldolase (158  
225 kDa), *M. infernus* NifB (36 kDa), *A. vinelandii* NifH homodimer (63 kDa), *A. vinelandii* NifEN  
226 heterotetramer (202 kDa) and *A. vinelandii* NifDK heterotetramer (230 kDa).

227 **Protein Mass Spectrometry.** Protein mass spectrometry was carried out with a 4800  
228 Proteomics Analyzer equipped with TOF/TOF mass spectrometer at the Proteomics facility of  
229 the Pharmacy School of Universidad Complutense de Madrid (Madrid, Spain).

230 **Immunoblot analysis of NifB<sup>RS</sup> expression.** Proteins samples were transferred to 0.45 μm  
231 nitrocellulose membranes after SDS-PAGE using a TransBlot Semi-dry transfer device (Bio-  
232 Rad, USA). Membranes were: (i) blocked for 1 h at room temperature (RT) using TBS-t buffer  
233 (20 mM Tris-HCl, 150 mM NaCl, 0.02% Tween-20, pH 7.5) supplemented with 5% (w/v) non-  
234 fat dried milk; (ii) washed twice using TBS-t buffer for 5-10 minutes; (iii) incubated with anti-  
235 His antibody (1:5,000 dilution) at 4 °C overnight in an orbital shaker. Primary antibody work  
236 solution was prepared in 5% BSA TBS-t buffer in the presence of 0.1% NaN<sub>3</sub>. Next day,  
237 membranes were washed 3 times with TBS-t buffer for 10 minutes and incubated with anti-  
238 mouse antibody solution (1:20,000 dilution) at RT for 1 h. Secondary antibody solution was  
239 prepared in buffer TBS-t supplemented with 2% milk. Membranes were washed 3 times for 10  
240 minutes in TBS-t buffer before developing signals by Enhance Chemiluminescence.

241 **Reconstitution of NifU<sup>Av</sup> [Fe<sub>4</sub>S<sub>4</sub>] clusters mediated by NifS<sup>Av</sup>.** Pure NifU<sup>Av</sup> was isolated  
242 from *E. coli* and reconstituted *in vitro* as described (6, 27). As-isolated NifU<sup>Av</sup> (20 μM) was  
243 diluted in 100 mM MOPS buffer, pH 7.5, supplemented with 8 mM of dithiothreitol (DTT) for  
244 30 minutes at 37 °C. The mixture was then supplemented with 1 mM L-cysteine, 225 nM of  
245 purified NifS<sup>Av</sup>, and 9 mM DTT. Iron was carefully supplemented in eight portions in 15 minute  
246 intervals to reach a final Fe(NH<sub>4</sub>)<sub>2</sub>(SO<sub>4</sub>)<sub>2</sub>·6H<sub>2</sub>O concentration of 0.8 mM. The reconstitution  
247 mixture was incubated at 4 °C for 3 hours. Iron and DTT excess were removed using 30-kDa  
248 centrifugal filter units followed by re-isolation of the reconstituted NifU<sup>Av</sup> (RC-NifU<sup>Av</sup>) through



249 a pre-packed 200  $\mu$ L StrepTactin-RS column (IBA LifeScience) to remove strep-tagged NifS  
250 from the mixture.

251 **NifH<sup>RS</sup> dinitrogenase reductase activity.** Titration reactions contained 3  $\mu$ g of pure NifDK<sup>Av</sup>  
252 (13 nM NifDK<sup>Av</sup>) and increasing amounts of pure NifH<sup>RS</sup> (up to 300 molar excess) in 0.2 mL  
253 of 22 mM Tris-HCl pH 7.4 supplemented with 0.8 mL of ATP regenerating mixture. Control  
254 reactions were performed with NifDK<sup>Av</sup> and NifH<sup>Av</sup> proteins. Assays were carried out in 9-mL  
255 sealed vials under 100% Ar. Reactions were initiated by injecting 500  $\mu$ L C<sub>2</sub>H<sub>2</sub>, proceeded for  
256 15 minutes at 30 °C, and were stopped with 100  $\mu$ L 8 M NaOH. C<sub>2</sub>H<sub>4</sub> production was measured  
257 by gas chromatography.

258 For NH<sub>3</sub> production activity, reaction mixtures contained 12  $\mu$ g of NifDK<sup>Av</sup> (34.8 nM) and  
259 145.6  $\mu$ g of NifH<sup>RS</sup> (1.57  $\mu$ M; 40-fold molar excess) in 0.2 mL of 100 mM MOPS pH 7.5  
260 supplemented with 0.8 mL of ATP regenerating mixture, Control reactions were performed  
261 with NifDK<sup>Av</sup> and NifH<sup>Av</sup> proteins. Assays were carried out in 9-mL sealed vials under 100%  
262 N<sub>2</sub> for 30 min at 30 °C. Reactions were stopped with 100  $\mu$ L 0.5 M EDTA. Twenty-five  $\mu$ L of  
263 each sample were used to determine NH<sub>3</sub>.

264 **NifH<sup>RS</sup> P-cluster maturation activity.** P-cluster maturation assays were performed *in vitro*  
265 by reconstituting the nitrogenase activity of apo-NifDK<sup>Av</sup> with immature P-clusters. The assays  
266 had three steps. The P-cluster maturation step was performed in 200  $\mu$ L reaction mixtures  
267 containing 0.6  $\mu$ M of apo-NifDK<sup>Av</sup> and 3  $\mu$ M NifH<sup>Av</sup> or NifH<sup>RS</sup> in ATP regenerating mixture.  
268 Reactions were incubated for 30 min at 30 °C with gentle agitation (350 rpm) in a ThermoBlock  
269 (Eppendorff). After P-cluster maturation, 1.2  $\mu$ M of pure FeMo-co was added to the reactions  
270 and incubated for additional 30 min at 30 °C. Reconstitution of apo-NifDK<sup>Av</sup> was stopped by  
271 addition of 10 nmol of ammonium tetrathiomolybdate ((NH<sub>4</sub>)<sub>2</sub>MoS<sub>4</sub>, Sigma). In a last step,  
272 acetylene reduction assays for reconstituted NifDK<sup>Av</sup> were performed. Reaction mixtures were  
273 transferred to 9-mL sealed vials containing NifH<sup>Av</sup> or NifH<sup>RS</sup> at 40-fold molar excess to apo-  
274 NifDK<sup>Av</sup> and 500  $\mu$ L of ATP regenerating mixture. Reactions were incubated with agitation for  
275 15 min at 30°C in a 94% Ar / 6% C<sub>2</sub>H<sub>2</sub> atmosphere and stopped with 100  $\mu$ L 8M NaOH. All  
276 steps were performed inside a glove box (CoyLabs) with <0.1 ppm of O<sub>2</sub>.

277 ***In vivo* genetic complementation of *A. vinelandii*  $\Delta$ nifH with nifH<sup>RS</sup>.** The nifH<sup>RS</sup> gene was  
278 amplified from plasmid pRHB513 using primers: 5'-  
279 GAAATGCAACCTGAGGAAATTACATATGGCTATGCGTCAAGTGGCGTTCTATGGTA  
280 AAGG and 3'- ACCGGAGCGGCTATCAGACTTCTTCGTCCACAATA. The intergenic

281 region between *nifH<sup>Av</sup>* and *nifD<sup>Av</sup>* was amplified from plasmid pDB6 with primers 5'-  
282 GCGAATACGGTATTGTGGACGAAGAAGTCTGATAG and 3'-  
283 CTTGGACTGGGTAACCGCCG. Amplified fragments were used as template in Phusion PCR  
284 reactions with primers 5'-  
285 GAAATGCAACCTGAGGAAATTACATATGGCTATGCGTCAAGTGGCGTTCTATGGTA  
286 AAGG and 3'- CTTGGACTGGGTAACCGCCG. The new PCR fragment containing *nifH<sup>RS</sup>*  
287 and the *nifH<sup>Av</sup>* and *nifD<sup>Av</sup>* intergenic region was digested with Bsu36I y BstEII and inserted into  
288 pDB6 digested with the same enzymes. The generated pASC36 plasmid has *nifH<sup>RS</sup>* replacing  
289 *nifH<sup>Av</sup>* in its native locus. To avoid improper *nifH<sup>RS</sup>* and *nifD<sup>Av</sup>* gene translation, the first and  
290 last three native codon sequences of *nifH<sup>Av</sup>* were included before and after of the *nifH<sup>RS</sup>*  
291 sequence. pASC36 was sequenced by Plasmidsaurus, Inc. *A. vinelandii* DC127 strain was  
292 generating by transformation of DC115 ( $\Delta$ *vnfDGK*::SmR,  $\Delta$ *anfHDGK*::GentR,  $\Delta$ *nifHD*::KanR)  
293 with pASC36 following established protocols (28). The presence of *nifH<sup>RS</sup>* replacing *nifH<sup>Av</sup>* in  
294 DC124 was confirmed by DNA sequencing. Strain DC124 was subsequently transformed with  
295 pDB2080 to insert a kanamycin resistance cassette in *vnfH*.

296 *A. vinelandii* cells were plated in Burk's modified nitrogen-free medium plates (29)  
297 supplemented with 1 $\mu$ M sodium molybdate. For non-diazotrophic conditions, 13 mM  
298 ammonium acetate was added to the media as the nitrogen source. Strains were grown at 30°C  
299 for 6 days.

300 **NifH<sup>RS</sup> FeMo-co synthesis activity.** Assays were performed in 100  $\mu$ L reaction mixes  
301 containing 2.55  $\mu$ M NifB-co, 3.0  $\mu$ M NifX<sup>Av</sup>, 1.5  $\mu$ M apo-NifEN<sup>Av</sup>, 3.0  $\mu$ M NifH<sup>RS</sup>, and 0.6  
302  $\mu$ M apo-NifDK<sup>Av</sup> supplemented with 17.5  $\mu$ M Na<sub>2</sub>MoO<sub>4</sub>, 175  $\mu$ M R-homocitrate and ATP  
303 regenerating mixture. Reactions for FeMo-co synthesis and insertion into apo-NifDK<sup>Av</sup> were  
304 incubated at 30 °C for 45 min. Activity of reconstituted NifDK<sup>Av</sup> was analyzed by the acetylene  
305 reduction assay after addition of 2.4 nmol of NifH<sup>RS</sup> (1:40 ratio of NifH<sup>RS</sup> to NifDK<sup>Av</sup>) and 0.5  
306 mL of ATP regenerating mixture in 9 mL sealed vials under 94% Ar / 6% C<sub>2</sub>H<sub>2</sub> for 15 min at  
307 30 °C. C<sub>2</sub>H<sub>4</sub> formation was measured by gas chromatography.

308 **NifB<sup>RS</sup>-dependent *in vitro* FeMo-co synthesis and insertion into apo-NifDK<sup>Av</sup>.** Assays  
309 were carried out in 100  $\mu$ L reactions containing 20  $\mu$ M NifB<sup>RS</sup>, 125  $\mu$ M FeSO<sub>4</sub>, 125  $\mu$ M Na<sub>2</sub>S,  
310 125  $\mu$ M SAM, 3.0  $\mu$ M NifX<sup>Av</sup>, 1.5  $\mu$ M apo-NifEN<sup>Av</sup>, 3.0  $\mu$ M NifH<sup>Av</sup>, 17.5  $\mu$ M Na<sub>2</sub>MoO<sub>4</sub>, 175  
311  $\mu$ M R-homocitrate, 0.6  $\mu$ M apo-NifDK<sup>Av</sup>, and ATP-regenerating mixture. Reactions for FeMo-  
312 co synthesis and insertion into apo-NifDK<sup>Av</sup> were incubated at 30 °C for 45 min. The activity  
313 of the reconstituted NifDK<sup>Av</sup> was analyzed by the acetylene reduction assay after the addition

314 of 1.2 nmol of NifH<sup>Av</sup> (1:20 ratio of NifH<sup>Av</sup> to NifDK<sup>Av</sup>) and 0.4 mL of ATP regenerating  
315 mixture in 9 mL sealed vials under 94% Ar / 6% C<sub>2</sub>H<sub>2</sub> for 15 min at 30 °C. C<sub>2</sub>H<sub>4</sub> formation was  
316 measured by gas chromatography.

317 ***In vivo* genetic complementation of *K. oxytoca* UC9 ( $\Delta$ nifB) with nifB<sup>RS</sup>.** Plasmid  
318 pN2LP41 carries a his-tagged nifB<sup>RS</sup> gene cloned under the control of IPTG-inducible *trc*  
319 promoter using the *Nco*I and *Bam*HI sites of pN2SB73, a pTRC-99a derivative that had the  
320 ampicillin resistance cassette replaced by kanamycin resistance. The *K. oxytoca* UC9 strain  
321 ( $\Delta$ nifB nif<sup>-</sup> phenotype) (17) was transformed with pN2LP41 for complementation or with  
322 pN2SB73 as negative control. Strains were incubated overnight at 30 °C in minimal medium  
323 supplemented with 28.5  $\mu$ M ammonium acetate (30). The following day, cells were washed  
324 three times using N-free minimal medium and were resuspended at OD<sub>600nm</sub> of 0.15 in 20 mL  
325 of N-free medium supplemented with the corresponding antibiotics and 0.1% serine for  
326 nitrogenase derepression. Cultures were set up in 100 mL vials with rubber-sealed caps and air  
327 was replaced with 100% N<sub>2</sub>. NifB<sup>RS</sup> expression was induced with 25  $\mu$ M IPTG. Cell growth  
328 was monitored with an Ultrospec 3300 Pro spectrophotometer (Amersham Biosciences). *In*  
329  *vivo* C<sub>2</sub>H<sub>2</sub> reduction was determined by C<sub>2</sub>H<sub>4</sub> production at 30 °C for 30 min using 1-mL culture  
330 samples in anaerobic Ar-flushed sealed 9-mL vials. Culture samples were withdrawn for  
331 immunoblot analysis as described above.

332

## 333 REFERENCES

- 334 1. J. W. Peters, K. Fisher, D. R. Dean, Nitrogenase structure and function: a biochemical-  
335 genetic perspective. *Annu. Rev. Microbiol.* **49**, 335-366 (1995).
- 336 2. D. Wolle, C. Kim, D. Dean, J. B. Howard, Ionic interactions in the nitrogenase complex.  
337 Properties of Fe-protein containing substitutions for Arg-100. *J. Biol. Chem.* **267**, 3667-3673  
338 (1992).
- 339 3. L. A. Rettberg *et al.*, Structural analysis of a nitrogenase iron protein from  
340 *Methanosarcina acetivorans*: Implications for CO<sub>2</sub> capture by a surface-exposed [Fe<sub>4</sub>S<sub>4</sub>]  
341 cluster. *mBio* **10** (2019).
- 342 4. Y. Nicolet, L. Zeppieri, P. Amara, J. C. Fontecilla-Camps, Crystal structure of  
343 tryptophan lyase (NosL): evidence for radical formation at the amino group of tryptophan.  
344 *Angew. Chem. Int. Ed.* **53**, 11840-11844 (2014).
- 345 5. L. Paya-Tormo *et al.*, A colorimetric method to measure *in vitro* nitrogenase

346 functionality for engineering nitrogen fixation. *Sci. Rep.* **12**, 10367 (2022).

347 6. A. D. Smith *et al.*, NifS-mediated assembly of [ 4Fe - 4S ] clusters in the N- and C-  
348 terminal domains of the NifU scaffold protein. *Biochemistry* **44**, 12955-12969 (2005).

349 7. R. R. Eady, B. E. Smith, K. A. Cook, J. R. Postgate, Nitrogenase of *Klebsiella*  
350 *pneumoniae*. Purification and properties of the component proteins. *Biochem. J.* **128**, 655-  
351 675 (1972).

352 8. V. K. Shah, W. J. Brill, Nitrogenase. IV. Simple method of purification to homogeneity  
353 of nitrogenase components from *Azotobacter vinelandii*. *Biochim. Biophys. Acta* **305**, 445-  
354 454 (1973).

355 9. W. R. Hagen, R. R. Eady, W. R. Dunham, H. Haaker, A novel S= 3/2 EPR signal  
356 associated with native Fe-proteins of nitrogenase. *FEBS J.* **189**, 250-254 (1985).

357 10. P. A. Lindahl, E. P. Days, T. A. Kent, W. H. Orme-Johnson, E. Münck, Mössbauer, EPR,  
358 and Magnetization Studies of the *Azotobacter vinelandii* Fe Protein. *J. Biol. Chem.* **260**,  
359 11160-11117 (1985).

360 11. W. H. Orme-Johnson *et al.*, Electron paramagnetic resonance of nitrogenase and  
361 nitrogenase components from *Clostridium pasteurianum* W5 and *Azotobacter vinelandii* OP.  
362 *Proc. Natl. Acad. Sci. U.S.A.* **69**, 3142-3145 (1972).

363 12. E. Jimenez-Vicente *et al.*, Sequential and differential interaction of assembly factors  
364 during nitrogenase MoFe protein maturation. *J. Biol. Chem.* **293**, 9812-9823 (2018).

365 13. A. Sosa Fajardo *et al.*, Structural insights into the mechanism of the radical SAM  
366 carbide synthase NifB, a key nitrogenase cofactor maturing enzyme. *J. Am. Chem. Soc.* **142**,  
367 11006-11012 (2020).

368 14. A. W. Fay, J. A. Wiig, C. C. Lee, Y. Hu, Identification and characterization of functional  
369 homologs of nitrogenase cofactor biosynthesis protein NifB from methanogens. *Proc. Natl.*  
370 *Acad. Sci. U.S.A.* **112** (2015).

371 15. J. Wilcoxon *et al.*, Electron paramagnetic resonance characterization of three iron-  
372 sulfur clusters present in the nitrogenase cofactor maturase NifB from *Methanocaldococcus*  
373 *infernus*. *J. Am. Chem. Soc.* **138**, 7468-7471 (2016).

374 16. L. Curatti *et al.*, In vitro synthesis of the iron-molybdenum cofactor of nitrogenase from  
375 iron, sulfur, molybdenum, and homocitrate using purified proteins. *Proc. Natl. Acad. Sci.*  
376 *U.S.A.* **104**, 17626-17631 (2007).

377 17. D. Zhao, L. Curatti, L. M. Rubio, Evidence for *nifU* and *nifS* participation in the  
378 biosynthesis of the iron-molybdenum cofactor of nitrogenase. *J. Biol. Chem.* **282**, 37016-  
379 37025 (2007).

- 380 18. X. X. Li, Q. Liu, X. M. Liu, H. W. Shi, S. F. Chen, Using synthetic biology to increase  
381 nitrogenase activity. *Microb. Cell Fact.* **15**, 43 (2016).
- 382 19. E. V. Koskela, A. D. Frey, Homologous recombinatorial cloning without the creation of  
383 single-stranded ends: exonuclease and ligation-independent cloning (ELIC). *Mol. Biotechnol.*  
384 **57**, 233-240 (2015).
- 385 20. J. C. Crack, J. Green, A. J. Thomson, N. E. Le Brun, "Techniques for the production,  
386 isolation, and analysis of iron-sulfur proteins" in Metalloproteins. *Methods in Molecular*  
387 *Biology*, J. Fontecilla-Camps, Y. Nicolet, Eds. (Humana Press, Totowa, NJ, 2014), vol. 1122,  
388 pp. 33-48.
- 389 21. B. J. Hoffman *et al.*, Lactose fed-batch overexpression of recombinant metalloproteins  
390 in *Escherichia coli* BL21 (DE3): process, control yielding high levels of metal-incorporated,  
391 soluble protein. *Protein Exp. Purif.* **6**, 646-654 (1995).
- 392 22. E. Jimenez-Vicente *et al.*, Application of affinity purification methods for analysis of  
393 the nitrogenase system from *Azotobacter vinelandii*. *Methods Enzymol.* **613**, 231-255 (2018).
- 394 23. D. T. Petasis, M. P. Hendrich, Quantitative Interpretation of Multifrequency Multimode  
395 EPR Spectra of Metal Containing Proteins, Enzymes, and Biomimetic Complexes. *Methods*  
396 *Enzymol.* **563**, 171-208 (2015).
- 397 24. H. D. Hill, J. G. Straka, Protein determination using bicinchoninic acid in the presence  
398 of sulfhydryl reagents. *Anal. Biochem.* **170**, 203-208 (1988).
- 399 25. M. L. Moss, M. G. Mellon, Colorimetric determination of iron with 2,2'-bipyridyl and  
400 with 2,2',2'-terpyridyl. *Ind. Eng. Chem., Anal. Ed.* **14**, 862-865 (1942).
- 401 26. U. K. Laemmli, Cleavage of structural proteins during the assembly of the head of  
402 bacteriophage T4. *Nature* **227**, 680-685 (1970).
- 403 27. X. Jiang *et al.*, Exploiting genetic diversity and gene synthesis to identify superior  
404 nitrogenase NifH protein variants to engineer N<sub>2</sub>-fixation in plants. *Commun. Biol.* **4**, 1-11  
405 (2021).
- 406 28. P. C. Dos Santos, Molecular biology and genetic engineering in nitrogen fixation.  
407 *Methods Mol. Biol.* **766**, 81-92 (2011).
- 408 29. G. W. Strandberg, P. W. Wilson, Formation of the nitrogen-fixing enzyme system in  
409 *Azotobacter vinelandii*. *Can J. Microbiol.* **14**, 25-31 (1968).
- 410 30. V. K. Shah, J. R. Allen, N. J. Spangler, P. W. Ludden, In vitro synthesis of the iron-  
411 molybdenum cofactor of nitrogenase. Purification and characterization of NifB cofactor, the  
412 product of NIFB protein. *J. Biol. Chem.* **269**, 1154-1158 (1994).
- 413



|               |                                                               |     |
|---------------|---------------------------------------------------------------|-----|
| <i>AvNifD</i> | MSQQVDKIKASYPLFLDQDYKMDLAKKRDGFEEKYPQDKIDEVFWQTTTKEYQELNFQRE  | 60  |
| <i>RsNifD</i> | -----MTSCLTLQER                                               | 10  |
| <i>AvVnfD</i> | -----MSNCELTVLKPAEVKLSPRDR                                    | 21  |
| <i>AvAnfD</i> | -----MTCEVKEKGR                                               | 10  |
|               | .. : .                                                        |     |
| <i>AvNifD</i> | ALTVNFAKACQFLGAVLCAFGFEKTMPIYVHSGCCVAYFRSYFNRHFRFPVSCVSDSMTE  | 120 |
| <i>RsNifD</i> | AVAINFTRSCAIGAMLANYGIHGAITINHGSGGCATYPRHQMSRHFREPVEVATTSLTE   | 70  |
| <i>VnfK</i>   | EGIINFMYDCQFAGAQQYAGIGIKDCIPLVHGGGCTMFVRLFLFAQHFKNFNDVASTSLHE | 81  |
| <i>AvAnfD</i> | VGTINFIFTCQFAGAQQFVSIKIKDCIGIVHGGGCVMFVRLIFSQHYKESFELASSSLHE  | 70  |
|               | :** * ** * : : ** : * : : ** * . . : * : *                    |     |
| <i>AvNifD</i> | DAAVFSGQQNMKDGQLQNCATYKP-DMIAVSTTCMAEVIIGDDLNAFINNSKK----EGFI | 175 |
| <i>RsNifD</i> | KTTVYCGKQNLAAALKNIWERFHP-TMIMVCSITCLSETIGDDIPAIIDE----FLDKHP  | 124 |
| <i>AvVnfD</i> | ESAVFSGAKRVEEGVLVLRARRYPNLRVPIITTCSTEVIGDDIEGSRVCNRA-LEAEFP   | 140 |
| <i>AvAnfD</i> | DGAVFSGACGRVEEAVDVLRSRYPDVKVVPITTCSTEVIGDDVDGVLKKLNEGLLKEKFP  | 130 |
|               | . : ** * . . : : : : : ** : * * * * : . *                     |     |
| <i>AvNifD</i> | PDEFPPVFAHTPSFVGSHTVGDWNMFEGIARYFTLKSMDDKVVGSNKKINIVPGFETYLG  | 235 |
| <i>RsNifD</i> | DVTIPIILSVKTPSYIGNHTTGFDFNLKEIALNLPDR--RKKKGETNGRIINIPGWVN-PG | 181 |
| <i>AvVnfD</i> | DRKIYLAPVHTPSFKGSHVTGYAECVKSVMFKTITDA---HGKGQPSGKLVVFGWVN-PG  | 196 |
| <i>AvAnfD</i> | DREVHLIAMHTPSFVGSMTSGYDVAVRDVVRHFA-----KREAPNDKINLLTGWVN-PG   | 183 |
|               | . : : ** * : * . : * : . . : : : : : ** * . * *               |     |
| <i>AvNifD</i> | NFRVIRMLSEMVGYSLLSDPEEVLDTPAD-GQFRMYAGTTQEMKDAPNALNIVLLQ      | 294 |
| <i>RsNifD</i> | DIRELKHMLREMGHLGLWITDYSFTLDGGYDPRPHVPRGGTIIHELRSSSKSLATIALQ   | 241 |
| <i>AvVnfD</i> | DVLLKRYFKEMDVEANIYMD-TEDFSPMLPNKSIETHGRTTVEDIADSANALATLSIA    | 255 |
| <i>AvAnfD</i> | DVKELKHLLEMIDIEANVLFE-IESFDSPIILPDGSAVSHGNTTIEDLIDTGNARATFALN | 242 |
|               | : . : * : : ** . : : : * : * * * * : : : : * . *              |     |
| <i>AvNifD</i> | PWHLEKTKKFVEGTWKHEVPKLNIMGLDWTEFLMKVSEISGQPTPASTKERGRIVDM     | 354 |
| <i>RsNifD</i> | RHVGGEAARIYERRYVPAHVLTMTIGLKNTEAFVNTLIEITDHTIPESLEVERARLLDA   | 301 |
| <i>AvVnfD</i> | RYEGNTTGELLQKTFAVPNALVNTPYGIKNTEMLRKAIEVTGKETPESTVRERGIALDA   | 315 |
| <i>AvAnfD</i> | RYEGTKAAEYLQKKFEIPAIIGPTPIGIRNTEIFLQNLKATGKPIQPSLAHERGVAIDA   | 302 |
|               | : . : : : * * : * * : : : : : : * * * * * . : *               |     |
| <i>AvNifD</i> | MTD-SFTWLHGKRFALWGDPDFVMGLVKFLELGCEFVHILCHNGNKR---WKKAVDAIL   | 410 |
| <i>RsNifD</i> | LVD-TMYTTGLRVALYGDPLLEGLVGLIAEMGMTAYILTAADNRP---WGERMVELT     | 357 |
| <i>AvVnfD</i> | LADLAFMFFANKKVAIFGHPDLVLGLAQFCMEVELEPVLLIGDDQGNKYKDPRIEELK    | 375 |
| <i>AvAnfD</i> | LADLAFMFLAEKRVAIYGAPDLVIGLAEFCLDLEMKPVLLLLGDDN-SKYVDDPRIKALQ  | 361 |
|               | : * : * : : * * : * * : * * : : : : * . * * : : :             |     |
| <i>AvNifD</i> | AASPYGKNATVYIGKDLWHIRSLVFTD--KPFMIGNSYCKFIQRDTLHKGKEFEVFLIR   | 468 |
| <i>RsNifD</i> | GE--LGVESEIILKGDLELHKRIKQQ--PVLLIICHSKGRFIAE-----AENIFLVR     | 406 |
| <i>AvVnfD</i> | NT--AHFDIEIVHNADLWELKRI-NAGLQLDLIMGHSKGRYVAI-----EANIFMVR     | 425 |
| <i>AvAnfD</i> | EN--VDYGMIEIVTNADEFWELNRIKNEGLELILICHSKGRFISI-----DYNIFMLR    | 412 |
|               | : * : * . * . : : * : * * : * * : : : * : * * : : * * :       |     |
| <i>AvNifD</i> | IGFPIFDRHLLHRSSTTLGYEGAMQILTTLVNSILERLDEETRGMQATDYNHD-----L   | 521 |
| <i>RsNifD</i> | VGFPVEDRFGHHRISIVGNGAIALVDEITNTIFERRATTIVSNTLIETGVEGPTSVPIA   | 466 |
| <i>AvVnfD</i> | VGFPFDRAGLYRKPSISYGAMELGEMIANAMFAHMEYTRNKEWILNTW-----         | 475 |
| <i>AvAnfD</i> | VGFPFYDRAGLFYPTVGYGAIWLAEQMANTLFADMEHKKKEWVNLNVW-----         | 462 |
|               | : * * * * * * * : * : * * : : : * : * : :                     |     |
| <i>AvNifD</i> | VR-----                                                       | 523 |
| <i>RsNifD</i> | LRNGTTHAG                                                     | 475 |
| <i>AvVnfD</i> | -----                                                         | 475 |
| <i>AvAnfD</i> | -----                                                         | 462 |

418  
419

420 **Figure S1: Amino acid sequence alignment of NifDK<sup>RS</sup> with the corresponding Nif, Vnf**  
 421 **and Anf polypeptides of *A. vinelandii*.** Alignments were produced with Clustal Omega. (A)  
 422 NifD alignment using *A. vinelandii* NifD (P07328), VnfD (P16855), AnfD (P16266), and

423 *Roseiflexus* NifD (A5USK3). (B) NifK alignment using *A. vinelandii* NifK (P07329), VnfK  
424 (C1DI23), AnfK (P16267), and *Roseiflexus* NifK (A5USK2). Amino acid numbering  
425 corresponds to the *A. vinelandii* NifD. Conserved residues are highlighted in green. Black  
426 boxes mark amino acid residues that serve as FeMo-co ligands and others that are conserved  
427 in the FeMo-co environment. Blue boxes mark residues involved in P-cluster coordination and  
428 environment in D and K polypeptides. Amino acid residues unique to V and Fe-only  
429 nitrogenases are highlighted in red. Green arrows point to NifD<sup>RS</sup> residues that suggest a Mo  
430 nitrogenase, either because they are unique to Mo nitrogenases or because they differ from  
431 VnfD and AnfD unique residues. The red arrow points to a residue that does not follow this  
432 rule. Black arrows point to FeMo-co coordinating residues.



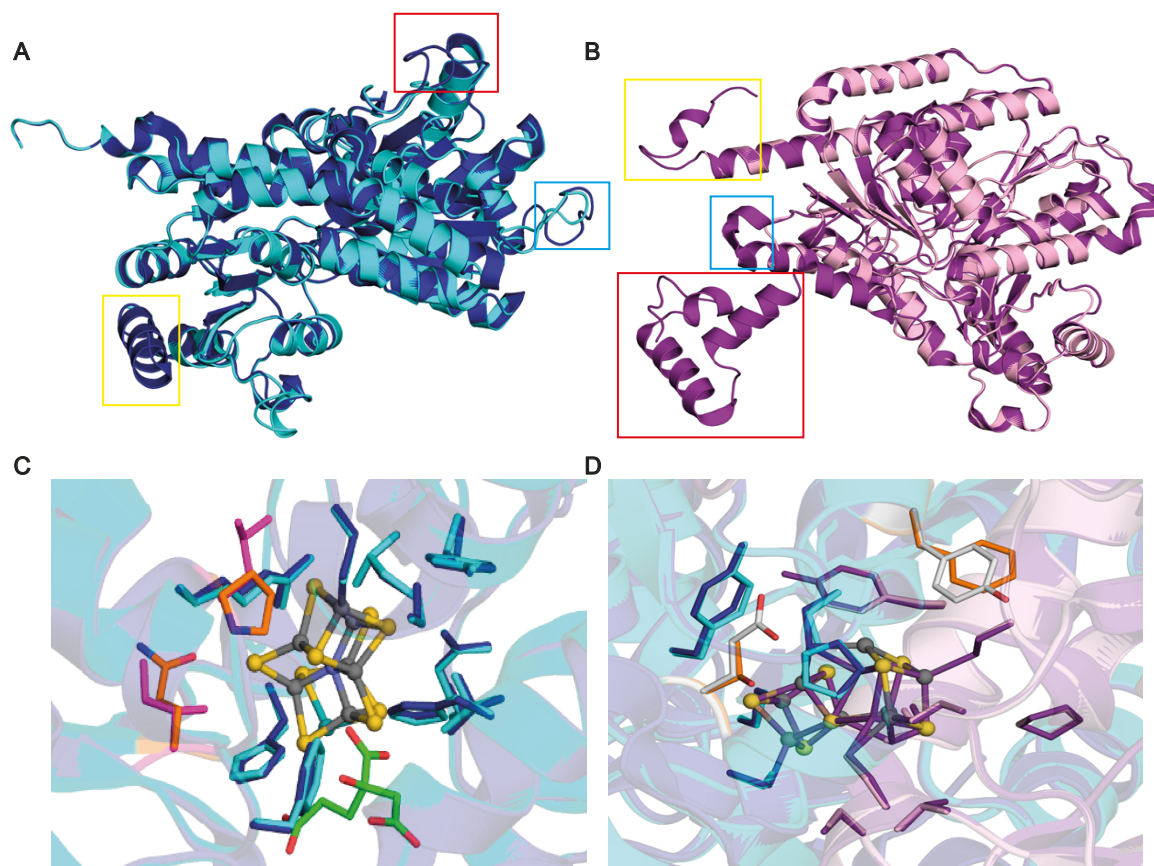

433

434 **Figure S2. Overlay of NifDK<sup>RS</sup> and NifDK<sup>4v</sup> structures and comparison of the FeMo-co**  
 435 **and P-cluster environments.** A ProMod3 model of NifDK<sup>RS</sup> and the crystal structure of  
 436 NifDK<sup>4v</sup> (PDB ID: 3U7Q) were used. **A)** Overlay of NifD subunits showing NifD<sup>4v</sup> in dark  
 437 blue and NifD<sup>RS</sup> in cyan. Color squares mark structural differences: yellow for the 4-19 residue  
 438  $\alpha$ -helix absent in NifD<sup>RS</sup>, red and blue for differences in the 101-108 and the 208-214 residue  
 439 loop, respectively. **B)** Overlay of NifK subunits showing NifK<sup>4v</sup> in purple and NifK<sup>RS</sup> in pink.  
 440 Color squares mark structural features that were absent in NifK<sup>RS</sup>: red for the 2-56 residue  
 441 segment, blue for the 453-462 residue loop and  $\alpha$ -helix, and yellow for the 509-534 segment  
 442 not modeled in NifK<sup>RS</sup>. **C)** Environment at 4 Å around FeMo-co. Conserved amino acid  
 443 residues in NifD<sup>4v</sup> (Val<sup>70</sup>, Arg<sup>96</sup>, His<sup>195</sup>, Tyr<sup>229</sup>, Ile<sup>231</sup>, Cys<sup>275</sup>, Ser<sup>278</sup>, Gly<sup>356</sup>, Gly<sup>357</sup>, Arg<sup>359</sup>,  
 444 Phe<sup>381</sup>, His<sup>442</sup>) and NifD<sup>RS</sup> (Val<sup>59</sup>, Arg<sup>85</sup>, His<sup>180</sup>, Tyr<sup>211</sup>, Ile<sup>213</sup>, Cys<sup>257</sup>, Ser<sup>260</sup>, Gly<sup>336</sup>, Gly<sup>337</sup>,  
 445 Arg<sup>339</sup>, Phe<sup>361</sup>, His<sup>422</sup>) are shown in dark blue and cyan, respectively, while non-conserved  
 446 residues in NifD<sup>4v</sup> (Ile<sup>355</sup>, Leu<sup>358</sup>) and NifD<sup>RS</sup> (Gln<sup>335</sup>, Pro<sup>338</sup>) are shown in magenta and orange,  
 447 respectively. The inorganic moiety of FeMo-co is shown in ball and sticks while homocitrate  
 448 is shown in sticks. FeMo-co atom color code: S in yellow, Fe in grey, Mo in cyan, C in green,  
 449 O in red. **D)** Environment at 4 Å around the P-cluster. The color codes of conserved amino acid  
 450 residues, P-cluster atoms, and ribbon structures are the same as in previous panels. Conserved

451 amino acid residues are shown for NifD<sup>Av</sup> (Cys<sup>62</sup>, Tyr<sup>64</sup>, Pro<sup>85</sup>, Gly<sup>87</sup>, Cys<sup>88</sup>, Cys<sup>154</sup>, Gly<sup>185</sup>),  
452 NifD<sup>RS</sup> (Cys<sup>51</sup>, Tyr<sup>53</sup>, Pro<sup>74</sup>, Gly<sup>76</sup>, Cys<sup>77</sup>, Cys<sup>139</sup>, Gly<sup>170</sup>), NifK<sup>Av</sup> (Cys<sup>70</sup>, Pro<sup>72</sup>, Ser<sup>92</sup>, Gly<sup>94</sup>,  
453 Cys<sup>95</sup>, Tyr<sup>198</sup>, Thr<sup>152</sup>, Cys<sup>153</sup>, Ser<sup>188</sup>), and NifK<sup>RS</sup> (Cys<sup>20</sup>, Pro<sup>22</sup>, Ser<sup>42</sup>, Gly<sup>44</sup>, Cys<sup>45</sup>, Tyr<sup>48</sup>, Thr<sup>102</sup>,  
454 Cys<sup>103</sup>, Ser<sup>137</sup>). Non conserved amino acid residues in NifD<sup>Av</sup> (Tyr<sup>91</sup>, Glu<sup>153</sup>) and NifD<sup>RS</sup> (Phe<sup>80</sup>,  
455 Thr<sup>138</sup>) are shown in white and orange, respectively.

456

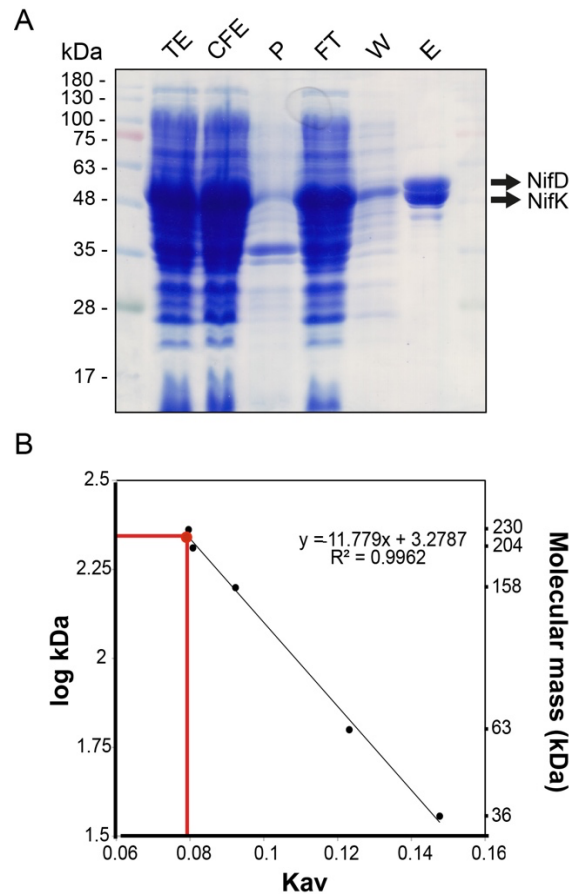

457

458 **Figure S3. Purification of NifDK<sup>RS</sup> from recombinant *E. coli* cells.** A) SDS-PAGE analysis  
 459 of the NifDK<sup>RS</sup> purification process. Purification fractions were loaded on 12% denaturing  
 460 acrylamide gels in the following order: Total Extract (TE), Cell-Free Extract (CFE), Pellet or  
 461 insoluble fraction (P), Flow Trough (FT), Wash (W) and Elution (E). B) NifDK<sup>RS</sup> molecular  
 462 mass determination by size-exclusion chromatography. NifDK<sup>RS</sup> migration is represented by a  
 463 red dot. Protein standards are represented by black dots in decreasing order of mass: NifDK<sup>Av</sup>  
 464 (230 kDa), NifEN<sup>Av</sup> (204 kDa), Aldolase (158 kDa), NifH<sup>Av</sup> (63 kDa) and *M. infernus* NifB<sup>Mi</sup>  
 465 (36 kDa). Linear regression fit parameters are shown.

466

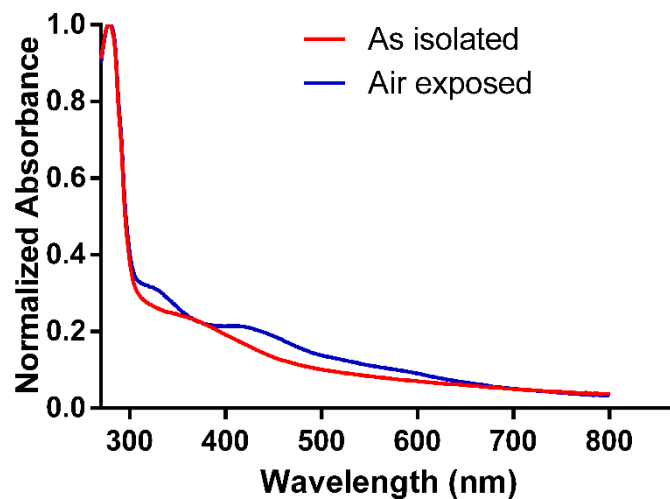

467  
468 **Figure S4. UV-Visible spectra of purified apo-NifDK<sup>RS</sup> in as isolated and air-exposed**  
469 **conditions.** Apo-NifDK<sup>RS</sup> had been co-expressed with NifH<sup>RS</sup> and NifUS<sup>Av</sup>. The changes in the  
470 UV-visible spectrum are indicative of the sensitivity of its [FeS] clusters to O<sub>2</sub>.  
471

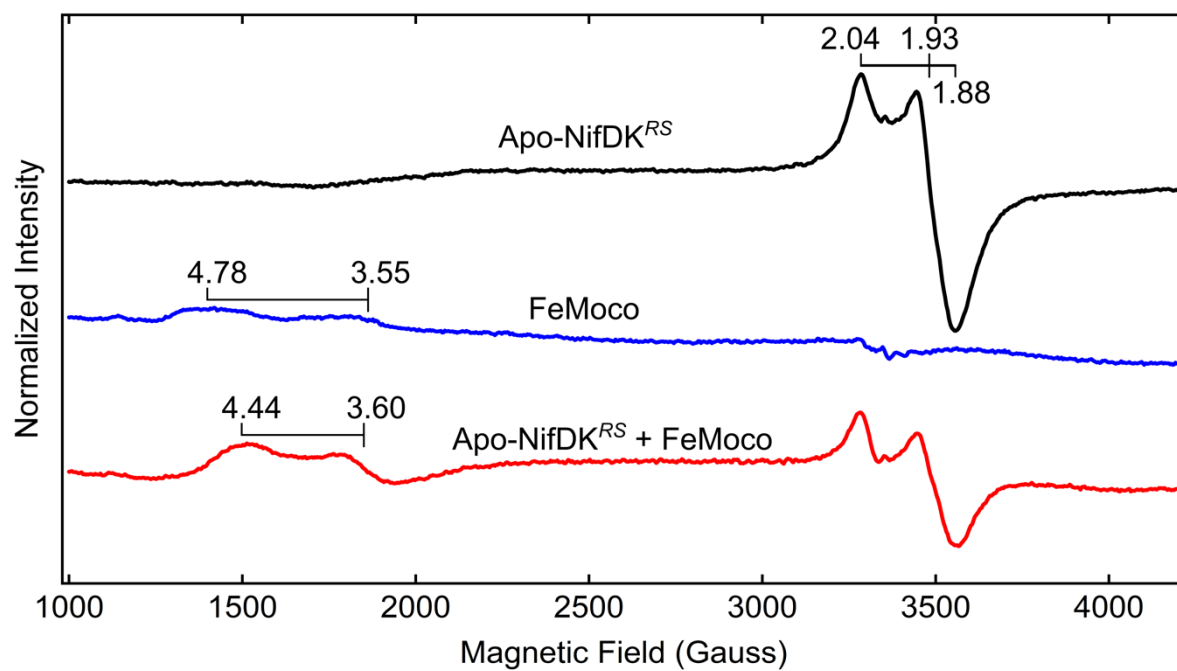

472

473 **Figure S5. Effect of FeMo-co on apo-NifDK<sup>RS</sup> EPR signals.** Spectra of DTH-reduced apo-  
 474 NifDK<sup>RS</sup> (black trace), pure FeMo-co (blue trace), and a repurified apo-NifDK<sup>RS</sup> after  
 475 incubation with FeMo-co (red trace) are shown. Relevant EPR signal g values are shown.  
 476 Spectra were recorded (10 scans) at microwave power of 20 mW and temperature of 12 K.

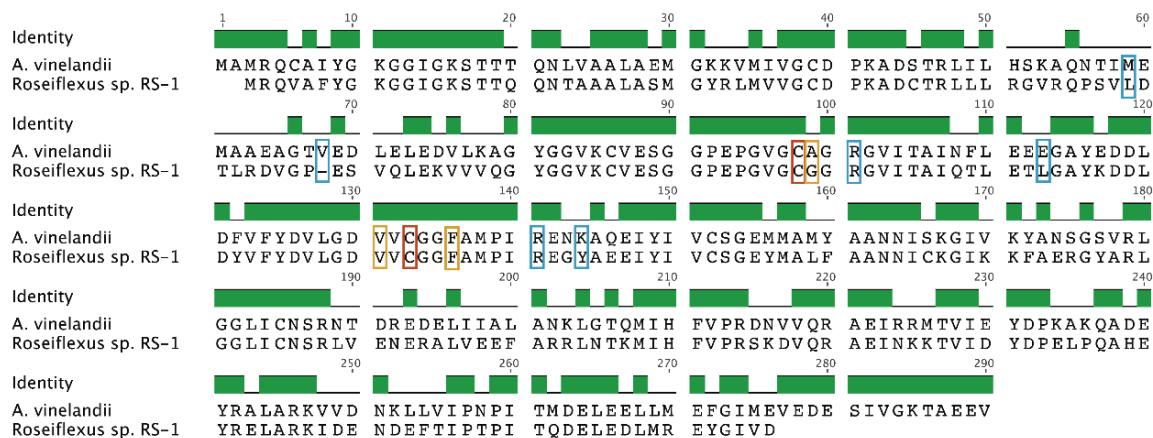

477

478 **Figure S6. Amino acid sequence alignment of NifH from *A. vinelandii* (NifH<sup>Av</sup>) and**  
 479 ***Roseiflexus* sp. RS-1 (NifH<sup>RS</sup>).** The [Fe<sub>4</sub>S<sub>4</sub>] coordinating residues are shown inside red boxes;  
 480 residues involved in NifDK interaction are shown in blue boxes; residues involved in other  
 481 important interactions are shown in orange boxes. This alignment was obtained using Geneious  
 482 version 7.1 (<http://www.geneious.com>).

483

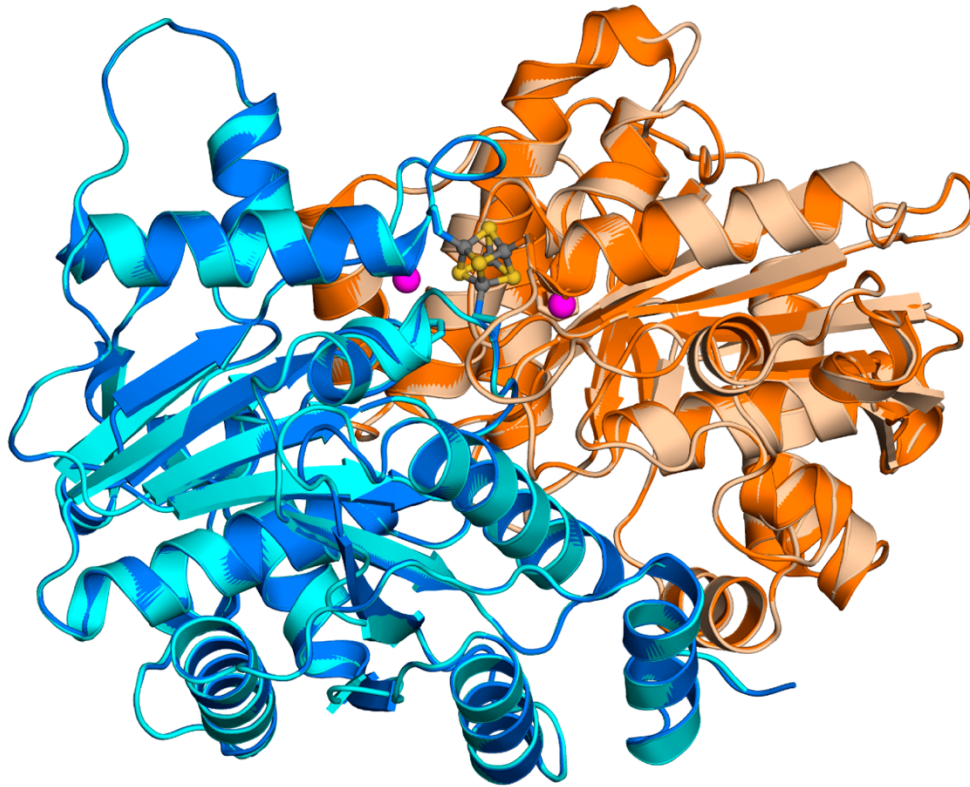

484

485 **Figure S7. Modeled 3D structure of the NifH<sup>RS</sup> dimer and overlap with the *M. acetivorans***  
486 **NifH structure (NifH<sup>Ma</sup>).** Dark blue and orange correspond to the with NifH<sup>Ma</sup> subunits (PDB:  
487 6NZJ) while cyan and light orange correspond to the NifH<sup>RS</sup> subunits. The pink spheres show  
488 the positions of A<sup>96</sup> methyl groups in each chain of NifH<sup>Ma</sup>. These groups are absent in NifH<sup>RS</sup>  
489 which present G<sup>96</sup> residues instead.

490

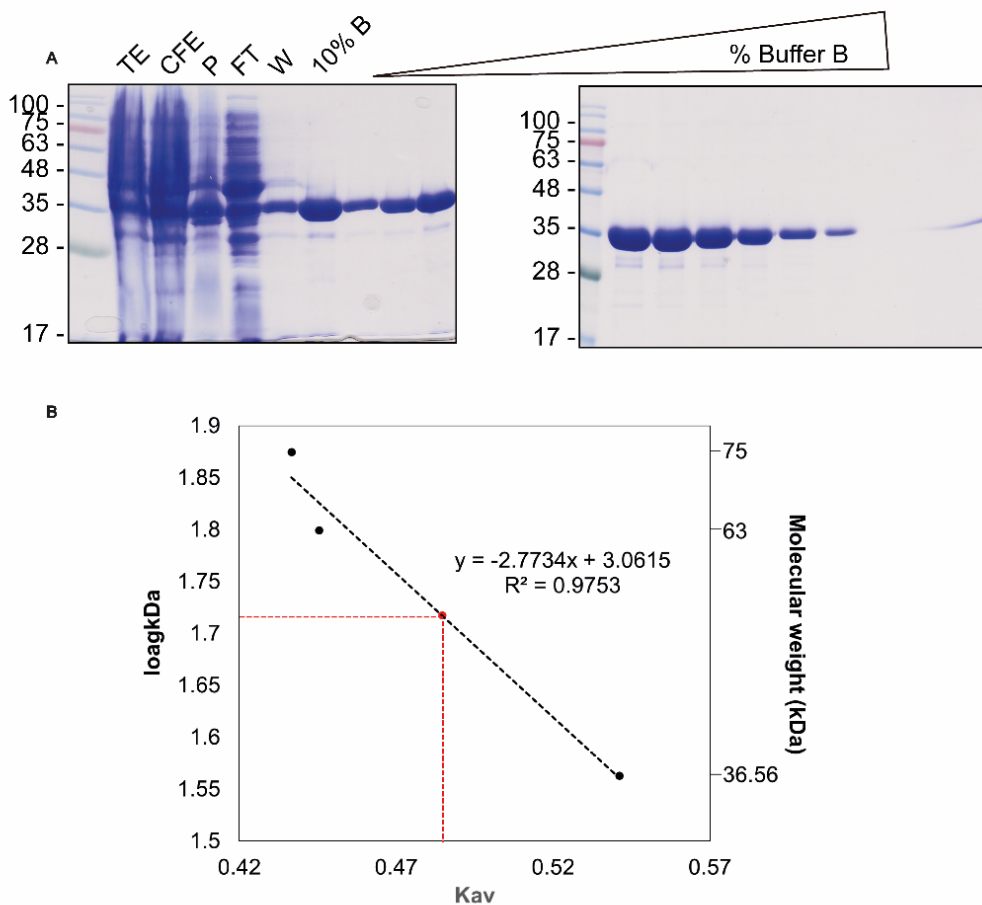

491

492 **Figure S8. NifH<sup>RS</sup> isolation from recombinant *E. coli* cells. A)** SDS-PAGE analysis of the  
 493 purification process. Purification fractions were loaded into SDS-PAGE gels in the following  
 494 order: Total extract (TE), soluble cell free extract (CFE), insoluble pellet (P), chromatography  
 495 flow through (FT), chromatography wash (W), second wash with 10% buffer B (10% B) and  
 496 protein elution trough an imidazole gradient (% Buffer B). **B)** NifH<sup>RS</sup> molecular mass  
 497 determined by size-exclusion chromatography. NifH<sup>RS</sup> migration is represented by a red dot.  
 498 Protein standards are represented by black dots in decreasing order of mass including  
 499 conoalbumin (75 kDa), NifH<sup>Av</sup> (63 kDa) and NifB<sup>Mi</sup> (36.5 kDa).



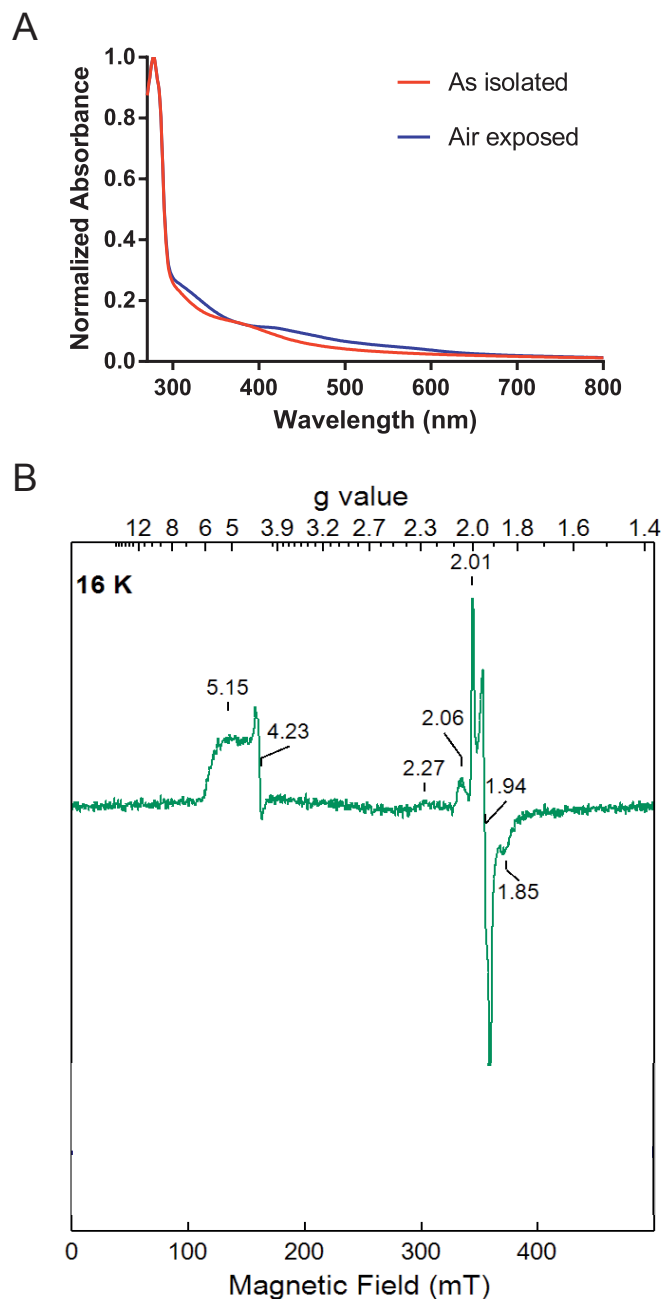

500

501 **Figure S9. Spectroscopic characterization of NifH<sup>RS</sup>.** NifH<sup>RS</sup> had been co-expressed with the  
 502 *isc<sup>Ec</sup>* gene cluster. **A)** UV-Visible spectra of as isolated (red line) and air-exposed NifH<sup>RS</sup> (blue  
 503 line). The changes in the UV-visible spectrum are indicative of the sensitivity of its [FeS]  
 504 clusters to O<sub>2</sub>. **B)** EPR spectrum of DTH-reduced NifH<sup>RS</sup>. The most representative g values are  
 505 indicated.

506

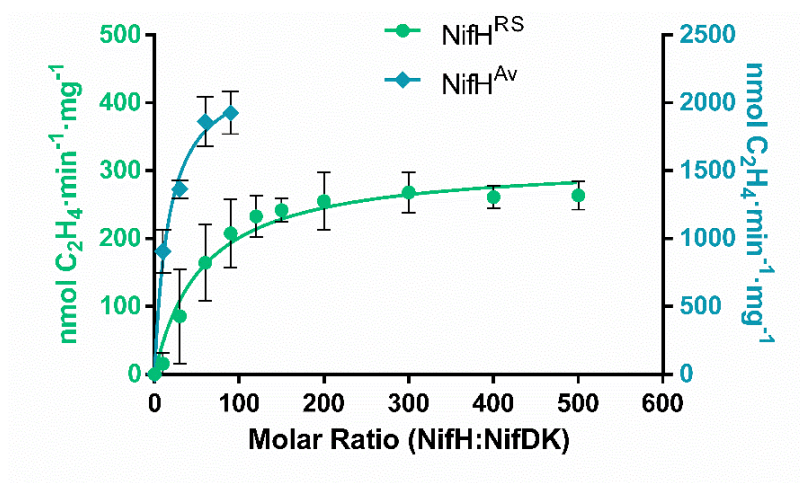

507

508 **Figure S10. Titration of NifDK<sup>Av</sup> activity with NifH<sup>RS</sup> or NifH<sup>Av</sup>.** Reactions were carried out  
509 at 30 °C for 15 minutes. Activities are expressed in nmol C<sub>2</sub>H<sub>4</sub>·min<sup>-1</sup>·mg<sup>-1</sup> of NifDK<sup>Av</sup> protein.  
510 Data shown are average activities ± SD (n ≥ 2).

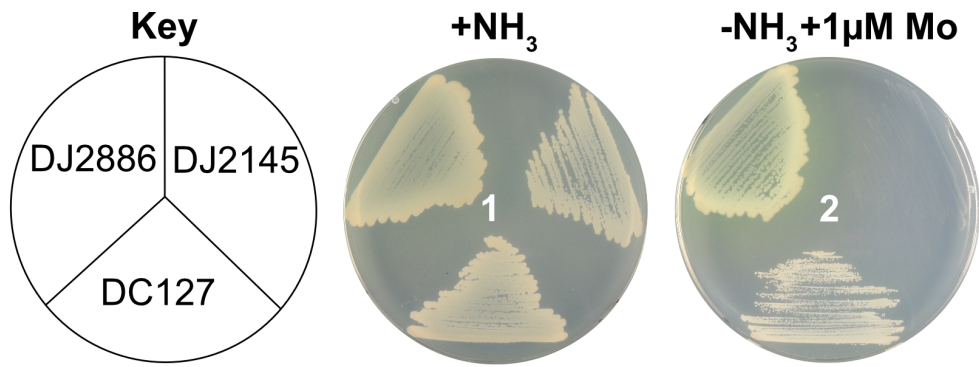

| Strain | Relevant genotype for:     |                       |                                                |
|--------|----------------------------|-----------------------|------------------------------------------------|
|        | <i>nifH</i>                | <i>vnfH</i>           | alternative systems                            |
| DJ2886 | <i>nifH<sup>Av</sup></i> , |                       | $\Delta vnfDGK::Sm^R$ , $\Delta anfDGK::Gen^R$ |
| DJ2145 | $\Delta nifH$ ,            | $\Delta vnfH::Km^R$   |                                                |
| DC127  | <i>nifH<sup>RS</sup></i> , | $\Delta vnfH::Km^R$ , | $\Delta vnfDGK::Sm^R$ , $\Delta anfDGK::Gen^R$ |

511

512 **Figure S11. Phenotypic characterization of an *A. vinelandii* strain with *nifH<sup>RS</sup>* replacing**  
 513 **the native *nifH<sup>Av</sup>*.** Strains were cultured on Burk's medium agar plates containing a fixed  
 514 nitrogen source (+NH<sub>3</sub>) or under diazotrophic conditions (-NH<sub>3</sub> supplemented with 1μM Mo).  
 515 DC127 carries *nifH<sup>RS</sup>* replacing *nifH<sup>Av</sup>* at its native locus and additionally lacks *vnfH*, *vnfDGK*,  
 516 and *anfDGK*. For comparison, DJ2886 (expressing only the Mo nitrogenase) and DJ2145 (with  
 517 deleted *nifH* and *vnfH* genes) were also cultured. DC127 diazotrophic growth is slower than  
 518 DJ2886. Relevant genotypes for each strain are indicated. DJ strains were kindly provided by  
 519 Dennis Dean.

520



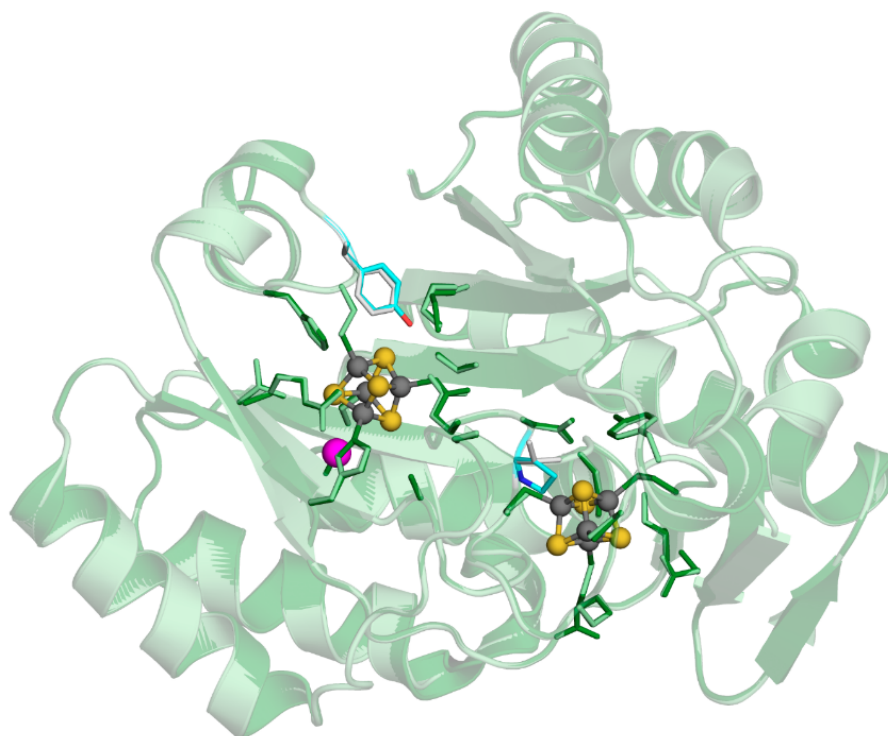

528

529 **Figure S13. NifB<sup>RS</sup> structural model constructed using NifB<sup>Mt</sup> (6Y1X) as template.**

530 Overlap in which dark green corresponds to the 6Y1X NifB<sup>Mt</sup> structure and light green

531 corresponds to the modelled NifB<sup>RS</sup> structure. Only the RS (left) and K1 (right) clusters are

532 shown in the structure because K2 was not present in the NifB<sup>Mt</sup> crystal structure. The magenta

533 sphere marks the position of A<sup>98</sup> in NifB<sup>Mt</sup> that is replaced by G<sup>93</sup> in NifB<sup>RS</sup>. In addition, F<sup>30</sup>

534 and P<sup>58</sup> in NifB<sup>Mt</sup> (white sticks) change to T<sup>25</sup> and V<sup>63</sup>, respectively, in NifB<sup>RS</sup> (cyan sticks).

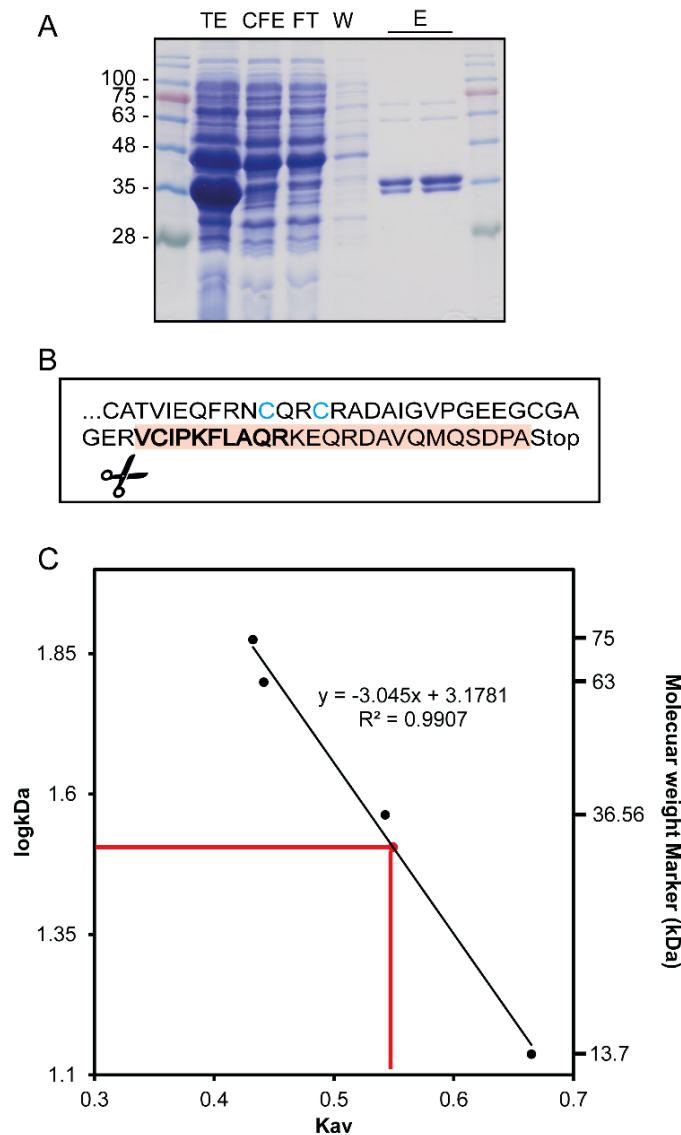

535

536 **Figure S14. NifB<sup>RS</sup> isolation from *E. coli* recombinant cells.** **A)** SDS-PAGE analysis of a  
 537 typical NifB<sup>RS</sup> purification procedure based on StrepTactin affinity chromatography.  
 538 Purification fractions were loaded into SDS-PAGE gels in the following order: Total extract  
 539 (TE), cell-free soluble extract (CFE), column flow through (FT), wash (W), and elution  
 540 fractions (E). **B)** C-terminal NifB<sup>RS</sup> amino acid sequence with bold characters showing the  
 541 MALDI detected end peptide. The light red background shows missing amino acids in the  
 542 truncated NifB<sup>RS</sup> version. The K2-cluster ligating cysteine residues (C<sup>268</sup> and C<sup>271</sup>) are shown  
 543 in blue indicating their presence in the NifB<sup>RS</sup> truncated form. **C)** NifB<sup>RS</sup> molecular mass was  
 544 determined using size-exclusion chromatography. NifB<sup>RS</sup> migration is represented by a red dot.  
 545 Proteins used as standards are represented by black dots in decreasing order of mass including  
 546 cobalbumin (75 kDa), NifH<sup>Av</sup> (63 kDa), NifB<sup>Mi</sup> (36 kDa) and ribonuclease (13.7 kDa).

547

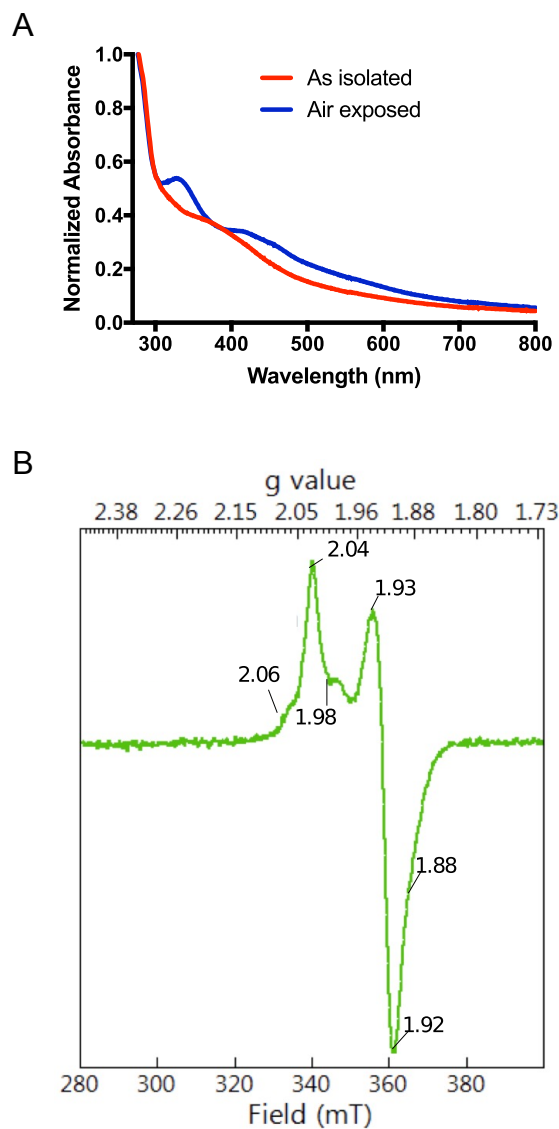

548

549 **Figure S15. Spectroscopic characterization of NifB<sup>RS</sup>.** NifB<sup>RS</sup> had been co-expressed with  
 550 NifUS<sup>Av</sup>. **A)** UV-Visible spectra of *as isolated* (red line) and air-exposed NifB<sup>RS</sup> (blue line). The  
 551 changes in the UV-visible spectrum are indicative of the sensitivity of its [FeS] clusters to O<sub>2</sub>.  
 552 **B)** EPR signal of DTH-reduced NifB<sup>RS</sup>. Representative g values corresponding to the three  
 553 [Fe<sub>4</sub>S<sub>4</sub>] clusters of NifB proteins are indicated.

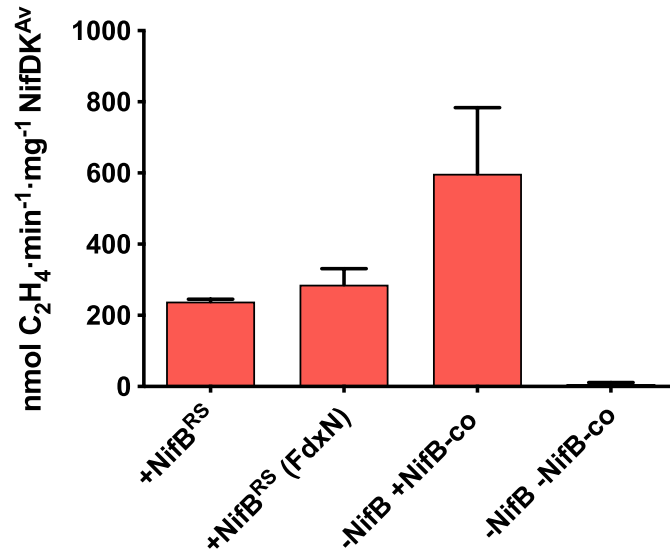

554

555 **Figure S16. NifB<sup>RS</sup> functions in the *in vitro* synthesis of FeMo-co.** NifB<sup>RS</sup> was obtained from  
 556 recombinant *E. coli* cells co-expressing *nifU<sup>Av</sup>*, *nifS<sup>Av</sup>* and, when indicated, *fdxN<sup>Av</sup>* genes.  
 557 Reactions lacking NifB<sup>RS</sup> were used as negative control whereas reactions including NifB-co  
 558 (the product of NifB) in place of NifB<sup>RS</sup> were used as positive controls. The activities of  
 559 reconstituted NifDK<sup>Av</sup> are average values obtained ± SD (n=2).

560



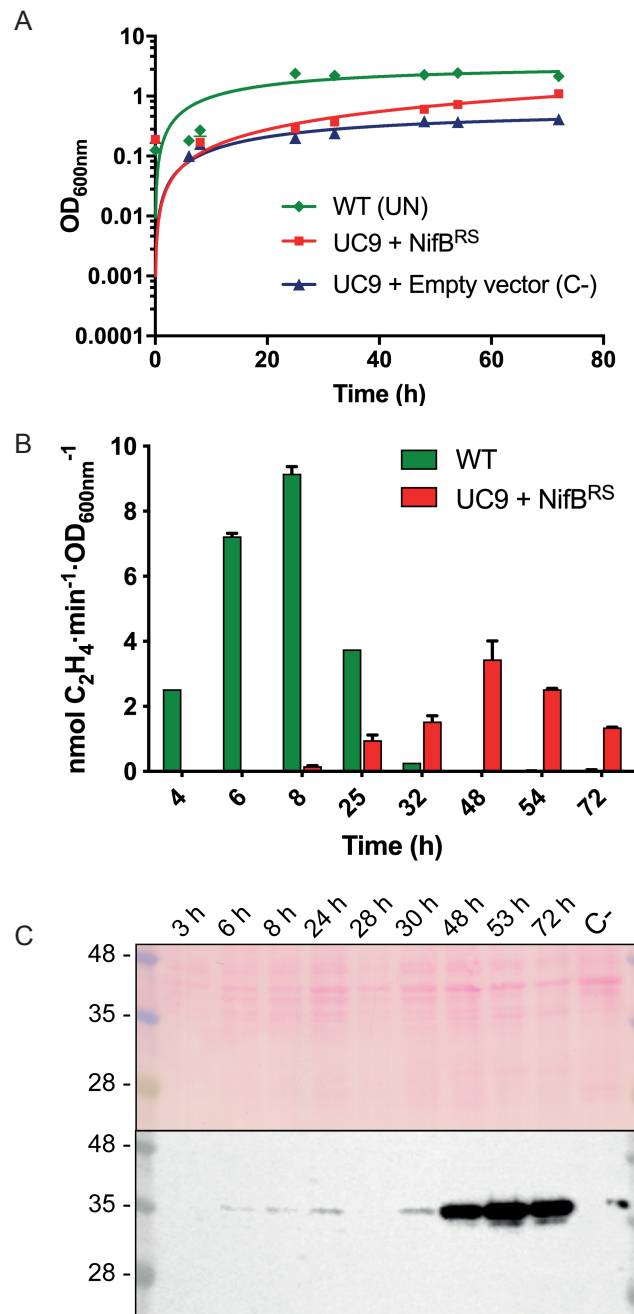

561

562 **Figure S17. *In vivo* genetic complementation of *nifB* deletion in *K. oxytoca* UC9 by *nifB<sup>RS</sup>*.**

563 **A) Diazotrophic growth of *K. oxytoca* wild type (green) and the  $\Delta nifB$  UC9 strain transformed**

564 **with pN2LP41, an expression plasmid carrying *his-nifB<sup>RS</sup>* (red). Empty vector C- refers to UC9**

565 **transformed with pN2SB73, the expression plasmid lacking *nifB<sup>RS</sup>* B) Time course of *in vivo***

566 **acetylene reduction. Data shown is the average of at least two replicates  $\pm$  SD. C) His-NifB<sup>RS</sup>**

567 **detection using  $\alpha$ -His antibody following nitrogenase derepression and simultaneous IPTG**

568 **induction. The C- lane corresponds to UC9 transformed with pN2SB73 at 72 h of derepression.**

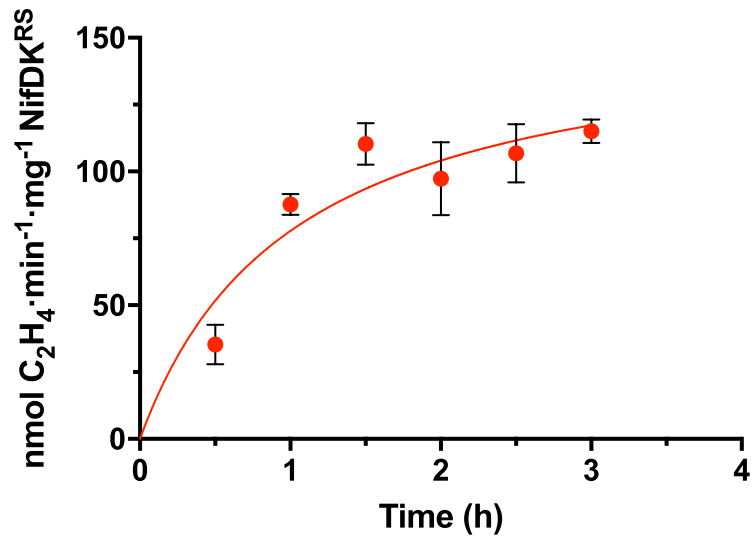

569

570 **Figure S18. Time course of FeMo-co synthesis and NifDK<sup>RS</sup> reconstitution.** Incubation  
571 times during the FeMo-co synthesis phase were 0.5, 1, 1.5, 2, 2.5 and 3 h. All assays were  
572 carried out at 48 °C, in the presence of Mo, and contained NifB<sup>RS</sup>, NifX<sup>4v</sup>, NifH<sup>RS</sup>, and apo-  
573 NifDK<sup>RS</sup>. Negative control assays lacking NifB<sup>RS</sup> showed negligible activity. Data represents  
574 average activity ± SD (n=2).

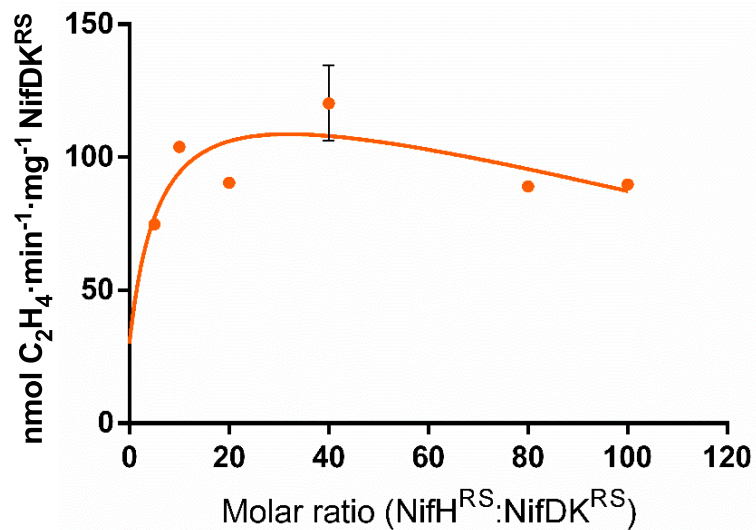

575

576 **Figure S19. Titration of NifDK<sup>RS</sup> activity with NifH<sup>RS</sup>.** NifB<sup>RS</sup>-dependent NifDK<sup>RS</sup>  
 577 reconstitution reactions were performed for 90 minutes at 48 °C. The NifDK<sup>RS</sup> to NifH<sup>RS</sup> molar  
 578 ratios used in the acetylene reduction assay were 1:5, 1:10, 1:20, 1:40, 1:80 and 1:100. Negative  
 579 control reactions lacking NifB<sup>RS</sup> yielded  $4.2 \pm 1.7$  C<sub>2</sub>H<sub>4</sub> · min<sup>-1</sup> · mg<sup>-1</sup> NifDK<sup>RS</sup>. Data are average  
 580 activities  $\pm$  SD (n=2).

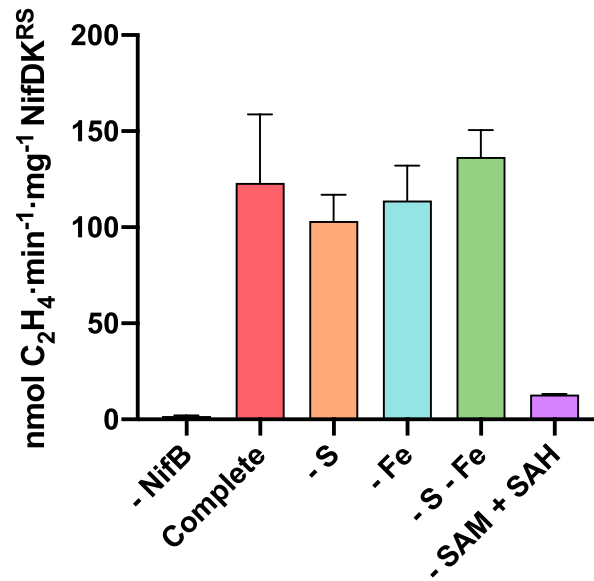

581

582 **Figure S20. Sulfur, iron, and SAM dependency of NifB<sup>RS</sup>-dependent FeMo-co synthesis**  
 583 **and insertion into apo-NifDK<sup>RS</sup>.** Protein components of the complete reactions are described  
 584 in Supporting Materials and Methods. The complete reactions contained Mo, Fe, S, SAM, and  
 585 homocitrate as substrates. Data represents average activities ± SD (n=2).

586 **Supporting Tables**

587

588 **Table S1.** Conserved amino acid residues in the FeMo-co and P-cluster environments of  
589 NifDK<sup>Av</sup> and NifDK<sup>RS</sup>.

590

| FeMo-co coordination        |                             | P-cluster coordination      |                             |
|-----------------------------|-----------------------------|-----------------------------|-----------------------------|
| NifDK <sup>Av</sup> residue | NifDK <sup>RS</sup> residue | NifDK <sup>Av</sup> residue | NifDK <sup>RS</sup> residue |
| C275                        | C257                        | C62                         | C51                         |
| H442                        | H422                        | C88                         | C77                         |
| S278                        | S260                        | C154                        | C139                        |
| G356                        | G336                        | S92                         | S81                         |
| G357                        | G337                        | C70 (β)                     | C20 (β)                     |
| R96                         | R85                         | C95 (β)                     | C45 (β)                     |
| R359                        | R339                        | C153 (β)                    | C103 (β)                    |
| H195                        | H180                        | S188 (β)                    | C137 (β)                    |
| G69                         | G58                         | G94 (β)                     | G44 (β)                     |
| V70                         | V59                         | G87                         | G76                         |
| Q191                        | Q176                        | G185                        | G170                        |
| E427                        | E407                        |                             |                             |

591

592 Residues located at NifK are indicated as (β). All other amino acid residues are from the NifD  
593 subunits.

594 **Table S2.** Relevant NifH amino acid residues conserved in NifH<sup>RS</sup> and their expected roles.

595

| NifH <sup>Av</sup> residue* | NifH <sup>RS</sup> residue | Role                                          |
|-----------------------------|----------------------------|-----------------------------------------------|
| C97                         | C95                        | [Fe <sub>4</sub> S <sub>4</sub> ] binding     |
| C132                        | C130                       |                                               |
| A98                         | G96                        | [Fe <sub>4</sub> S <sub>4</sub> ] interaction |
| V130                        | V128                       |                                               |
| F135                        | F133                       |                                               |
| R100                        | R98                        | NifDK protein interaction                     |
| E112                        | L110                       |                                               |
| R140                        | R138                       |                                               |
| K143                        | Y141                       |                                               |
| M58                         | L57                        |                                               |
| V67                         | -                          |                                               |

596

597 \* NifH<sup>Av</sup> amino acid residue numbering without the N-terminal methionine.

598

599 **Table S3.** Activity of NifH<sup>Av</sup> and NifH<sup>RS</sup> in nitrogenase catalysis (C<sub>2</sub>H<sub>2</sub> and N<sub>2</sub> reduction),  
 600 FeMo-co synthesis, and P-cluster formation.

601

| NifH activity (Substrate)                            | nmol (C <sub>2</sub> H <sub>4</sub> or NH <sub>3</sub> )·min <sup>-1</sup> ·mg <sup>-1</sup> NifDK <sup>Av</sup> |                    |
|------------------------------------------------------|------------------------------------------------------------------------------------------------------------------|--------------------|
|                                                      | NifH <sup>Av</sup>                                                                                               | NifH <sup>RS</sup> |
| Reductase (C <sub>2</sub> H <sub>2</sub> )           | 1926 ± 94                                                                                                        | 301 ± 32           |
| Reductase (N <sub>2</sub> )                          | 670 ± 25                                                                                                         | 141 ± 19           |
| FeMo-co synthesis (C <sub>2</sub> H <sub>2</sub> )   | 715 ± 47                                                                                                         | 74 ± 29            |
| P-cluster formation (C <sub>2</sub> H <sub>2</sub> ) | 243 ± 62                                                                                                         | 29 ± 4             |

602

603 Reductase activities were determined as described in Supporting Information Methods (NifH<sup>RS</sup>  
 604 dinitrogenase reductase activity). Activities in FeMo-co synthesis were estimated using P-  
 605 cluster containing apo-NifDK<sup>Av</sup> (see NifH<sup>RS</sup> FeMo-co synthesis activity in SI Methods).  
 606 Control reactions of nitrogenase reconstitution by the simple addition of isolated FeMo-co  
 607 (FeMo-co insertion assays) yielded 521 ± 117 nmol C<sub>2</sub>H<sub>4</sub>·min<sup>-1</sup>·mg<sup>-1</sup> NifDK<sup>Av</sup>. P-cluster  
 608 formation activities were estimated in a three-step assay (see NifH<sup>RS</sup> P-cluster maturation  
 609 activity in SI Methods): incubation of NifH<sup>Av</sup> (or NifH<sup>RS</sup>) with apo-NifDK<sup>Av</sup> for P-cluster  
 610 maturation, addition of pure FeMo-co for its insertion into apo-NifDK<sup>Av</sup>, and determination of  
 611 the acetylene reduction activity of reconstituted NifDK<sup>Av</sup>. Negative control reactions lacking  
 612 the first step but using NifH<sup>Av</sup> or NifH<sup>RS</sup> for the acetylene reduction step yielded 27 ± 10 or 5 ±  
 613 1 nmol C<sub>2</sub>H<sub>4</sub>·min<sup>-1</sup>·mg<sup>-1</sup> NifDK<sup>Av</sup>, respectively. Reactions using NifH<sup>RS</sup> in the P-cluster  
 614 maturation step and NifH<sup>Av</sup> in the acetylene reduction yielded 155 ± 27 nmol C<sub>2</sub>H<sub>4</sub>·min<sup>-1</sup>·mg<sup>-1</sup>  
 615 NifDK<sup>Av</sup>. The substrate used for each activity is indicated in parenthesis. Data are average  
 616 activities ± SD (n ≥ 2).

617 **Table S4.** Conserved amino acid residues expected to be involved in RS, K1 and K2-cluster  
 618 binding in NifB<sup>RS</sup> by comparison with *M. thermoacetophila* NifB (NifB<sup>Mt</sup>).

619

| NifB <sup>Mt</sup> residue | NifB <sup>RS</sup> residue | Cluster bound (Motif)                                |
|----------------------------|----------------------------|------------------------------------------------------|
| C49                        | C44                        | RS-cluster (Cx <sub>3</sub> Cx <sub>2</sub> C motif) |
| C53                        | C48                        |                                                      |
| C56                        | C51                        |                                                      |
| C62*                       | C57                        |                                                      |
| C29                        | C24                        | K1-cluster (HPC and ExRP motifs)                     |
| C128                       | C123                       |                                                      |
| H42                        | H37                        |                                                      |
| E65                        | E60                        |                                                      |
| C273                       | C268                       | K2-cluster (Cx <sub>2</sub> CRxDA motif)             |
| C276                       | C271                       |                                                      |
| D279                       | D274                       |                                                      |
| H27                        | H22                        | <u>H</u> PC motif                                    |

620

621 \*C62 residue is not always a ligand of the RS-cluster as it is displaced by SAM to initiate  
 622 catalysis.(13)

623



624 **Table S5.** Inhibitory effect of W on apo-NifDK<sup>Av</sup> and apo-NifDK<sup>RS</sup> reconstitution.

|                                         | <b>Apo-NifDK<sup>Av</sup></b> | <b>Apo-NifDK<sup>RS</sup></b> | <b>Apo-NifDK<sup>RS</sup></b> |
|-----------------------------------------|-------------------------------|-------------------------------|-------------------------------|
| <b>[WO<sub>4</sub><sup>2-</sup>] μM</b> | <b>Mo added first *</b>       | <b>Mo added first*</b>        | <b>W added first**</b>        |
|                                         | <b>(% activity)</b>           | <b>(% activity)</b>           | <b>(% activity)</b>           |
| 0 (x 0)                                 | 100.0                         | 100.0                         | 100.0                         |
| 17.5 (x 1)                              | 98.5                          | 94.6                          | 100.9                         |
| 175 (x10)                               | 97.7                          | 97.1                          | 96.1                          |
| 350 (x 20)                              | 94.5                          | 83.9                          | 104.7                         |
| 875 (x 50)                              | 83.2                          | 78.5                          | 84.5                          |
| 1750 (x 100)                            | 63.2                          | 68.1                          | 69.4                          |

625

626 \* In these assays, apo-NifDK was incubated with molybdate before tungstate addition.

627 \*\* In these assays, apo-NifDK<sup>RS</sup> was incubated with tungstate before molybdate addition.

628 The number in parenthesis indicate the excess of tungstate concentration with respect to  
 629 molybdate (17.5 μM) in the assay. Reactions with 17.5 μM molybdate and no tungstate yielded  
 630 389.4 ± 76.9 C<sub>2</sub>H<sub>4</sub>·min<sup>-1</sup>·mg<sup>-1</sup> NifDK<sup>Av</sup> and 115.06 ± 32.15 C<sub>2</sub>H<sub>4</sub>·min<sup>-1</sup>·mg<sup>-1</sup> NifDK<sup>RS</sup> (100%  
 631 activity). Reactions without molybdate and 100 μM tungstate yielded 43.2 ± 8. C<sub>2</sub>H<sub>4</sub>·min<sup>-1</sup>·mg<sup>-1</sup>  
 632 NifDK<sup>Av</sup> (11% activity) and 14.2 C<sub>2</sub>H<sub>4</sub>·min<sup>-1</sup>·mg<sup>-1</sup> NifDK<sup>RS</sup> (12% activity). Reactions with  
 633 neither molybdate nor tungstate yielded 44.4 ± 3.1 C<sub>2</sub>H<sub>4</sub>·min<sup>-1</sup>·mg<sup>-1</sup> NifDK<sup>Av</sup> (11% activity)  
 634 and 15.5 ± 0.6 C<sub>2</sub>H<sub>4</sub>·min<sup>-1</sup>·mg<sup>-1</sup> NifDK<sup>RS</sup> (13% activity). Data are average ± SD of at least 2  
 635 independent reactions.

636

637 **Table S6.** Plasmids used in this work.

638

| <b>Plasmid</b> | <b>DNA Construct</b>                                     | <b>Source</b>              |
|----------------|----------------------------------------------------------|----------------------------|
| pDB6           | <i>nifHDK<sup>Av</sup></i> region                        | Dennis Dean                |
| pDB2080        | $\Delta$ <i>vnfH::Km<sup>R</sup></i>                     | Dennis Dean                |
| pASC36         | pDB6- <i>nifH<sup>RS</sup>-nifDK<sup>Av</sup></i>        | This study                 |
| pRHB513        | pET16b-his- <i>nifH-nifBDK<sup>RS</sup></i>              | This study                 |
| pN2LP123       | pET16b-TwinStreptagII-TEV- <i>nifB<sup>RS</sup></i>      | This study                 |
| pN2LP49        | pTRC99a- <i>StrepTagII-nifDK<sup>RS</sup></i>            | This study                 |
| pETDuet-1      | pRSF- <i>isc-metK</i> -Duet-1                            | J. Fontecilla / Y. Nicolet |
| pRHB608        | pGEMT- <i>nifUS</i>                                      | L. Rubio                   |
| pN2LP30        | pRSF- <i>nifUS<sup>Av</sup>-metK</i> -Duet-1             | This study                 |
| pN2LP50        | pRSF- <i>isc-nifH<sup>RS</sup></i> Duet-1                | This study                 |
| pN2LP51        | pRSF- <i>nifUS<sup>Av</sup>-nifH<sup>RS</sup></i> Duet-1 | This study                 |
| pN2SB73        | Km <sup>r</sup> pTRC-99a derivative                      | L. Rubio                   |
| pN2LP41        | pN2SB73- <i>his-nifB<sup>RS</sup></i>                    | This study                 |

639
